1 **Broadband spectral responses in visual cortex revealed by a new**  
2 **MEG denoising algorithm**

3  
4 Eline R. Kupers<sup>1</sup>, Helena X. Wang<sup>1</sup>, Kaoru Amano<sup>2</sup>, Kendrick N. Kay<sup>3</sup>, David J. Heeger<sup>1</sup>,  
5 Jonathan Winawer<sup>1</sup>

6 **Author institutions**

7 1. Department of Psychology and Center for Neural Science, New York University

8 2. Center for Information and Neural Networks (CiNet), National Institute of Information and  
9 Communications Technology

10 3. Center for Magnetic Resonance Research, University of Minnesota

11

12 **Short title:** Broadband spectral responses in visual cortex

13

14 **Contact information:**

15 Eline Kupers

16 Department of Psychology, New York University

17 New York University

18 6 Washington Place, Room 959

19 New York, NY 10003

20 [eline.kupers@nyu.edu](mailto:eline.kupers@nyu.edu)

21

22 **Acknowledgments:** This study was supported NEI grant R00-EY022116 (J.W.), and NIMH grant R01-  
23 MH111417 (J.W.).

24

## 25 Abstract

26 Currently, non-invasive methods for studying the human brain do not reliably measure spike-rate-  
27 dependent signals, independent of other responses such as hemodynamic coupling (fMRI) and  
28 subthreshold neuronal synchrony (oscillations and event-related potentials). In contrast, invasive  
29 methods – animal microelectrode recordings and human electrocorticography (ECoG) – have  
30 recently measured broadband power elevation in field potentials (~50-200 Hz) as a proxy for the  
31 locally averaged spike rates. Here, we sought to detect and quantify stimulus-related broadband  
32 responses using magnetoencephalography (MEG) in individual subjects. Because extracranial  
33 measurements like MEG have multiple global noise sources and a relatively low signal-to-noise  
34 ratio, we developed an automated denoising technique, adapted from ([Kay et al., 2013](#)), that helps  
35 reveal the broadband signal of interest. Subjects viewed 12-Hz contrast-reversing patterns in the  
36 left, right, or bilateral visual field. Sensor time series were separated into an evoked component  
37 (12-Hz amplitude) and a broadband component (60–150 Hz, excluding stimulus harmonics). In all  
38 subjects, denoised broadband responses were reliably measured in sensors over occipital cortex.  
39 The spatial pattern of the broadband measure depended on the stimulus, with greater broadband  
40 power in sensors contralateral to the stimulus. Because we obtain reliable broadband estimates  
41 with relatively short experiments (~20 minutes), with a sufficient signal-to-noise-ratio to  
42 distinguish responses to different stimuli, we conclude that MEG broadband signals, denoised with  
43 our method, offer a practical, non-invasive means for characterizing spike-rate-dependent neural  
44 activity for a wide range of scientific questions about human brain function.

## 45 Significance Statement

46 Neuronal activity causes perturbations in nearby electrical fields. These perturbations can be  
47 measured non-invasively in the living human brain using EEG and MEG. These techniques have  
48 emphasized two kinds of measurements: oscillations and event-related responses. A third type of  
49 signal, a stimulus-related increase in power spanning a wide range of frequencies ('broadband'), is  
50 routinely measured in invasive recordings, but not with MEG and EEG. This broadband response is  
51 of great interest because unlike oscillations and event-related responses, it is correlated with  
52 neuronal spike rates. Here we report quantitative, spatially specific measurements of broadband  
53 fields in individual human subjects using MEG. These results demonstrate that a spike-rate-  
54 dependent measure of brain activity can be obtained non-invasively from the living human brain.

55  
56 **Key words:** MEG, spectral analysis, denoising, broadband, visual cortex, steady state visual evoked  
57 fields  
58

## 59 Introduction

60 The time-varying electric and magnetic fields near neural tissue provide an indirect but rich source  
61 of information about the activity of neural populations ([reviewed by Buzsaki et al., 2012](#)). These  
62 signals include rapid, ‘evoked’ responses that are time-locked to stimulus events ([Norcia et al.,  
63 2015](#)), oscillatory responses ([Berger, 1929](#)), and non-oscillatory, broadband signals ([Miller et al.,  
64 2007](#); [Miller et al., 2009c](#)). Broadband signals associated with sensory or motor tasks have been  
65 widely observed in human electrocorticography, or ‘ECoG’, ([Miller et al., 2014](#)) and animal  
66 microelectrode recordings ([Henrie and Shapley, 2005](#)). The broadband signal is an elevation in  
67 spectral power, typically spanning 50 to >200 Hz ([Miller et al., 2009b](#)), and has attracted a great  
68 deal of attention for several reasons.

69 First, the broadband signal is correlated with the level of neural activity (multi-unit spiking), and  
70 hence provides a way to study population-level spiking activity in a cortical region ([Liu and  
71 Newsome, 2006](#); [Manning et al., 2009](#); [Ray and Maunsell, 2011](#)). Second, the broadband signal has a  
72 smaller point spread function on the cortical surface than low frequency oscillations (8-25 Hz)  
73 ([Miller et al., 2009c](#); [Hermes et al., 2012b](#)), and is therefore useful both for characterizing local  
74 properties of cortex and as a tool for neural prosthetics ([Schalk and Leuthardt, 2011](#)). Third, the  
75 broadband signal is correlated with a portion of the fMRI response and, together with other field  
76 potential measures, can be used to understand neural factors underlying an observed BOLD  
77 response ([Hermes et al., 2012b](#); [Lima et al., 2014](#)). Finally, because it can be measured at high  
78 temporal resolution, the broadband signal is useful for characterizing the temporal dynamics of  
79 neuronal activity ([Honey et al., 2012](#); [Podvalny et al., 2017](#)).

80 In contrast to intracranial recordings, in the extracranial measures of electroencephalography  
81 (EEG) and magnetoencephalography (MEG), broadband responses have not been widely and  
82 reliably observed. One significant challenge in identifying broadband in extracranial measures is  
83 that non-neural noise sources, particularly from miniature saccades, can be confounded with  
84 experimental designs, making neurally induced broadband responses hard to isolate ([Yuval-  
85 Greenberg et al., 2008](#); [Yuval-Greenberg and Deouell, 2009, 2011](#); [Carl et al., 2012](#)).

86 A second challenge in measuring broadband extracranially is that the response is most evident in  
87 high frequencies (> 60 Hz), and the signal amplitude at these frequencies is low. While intracranial  
88 recordings have relatively high signal-to-noise ratios (SNR) even at these higher frequencies ([Miller  
89 et al., 2014](#)), EEG and MEG do not ([Hämäläinen et al., 1993](#)). Broadband signals can extend to lower  
90 frequencies ([Harvey et al., 2013](#); [Winawer et al., 2013](#)), but oscillatory processes in lower frequency  
91 bands often mask broadband measures in this range ([Miller et al., 2009c](#)).

92 A third challenge is the potential confound between broadband signals and narrowband gamma  
93 oscillations. Narrowband gamma oscillations have been successfully measured with MEG and EEG,  
94 particularly in visual cortex for high contrast gratings ([Hoogenboom et al., 2006](#); [Fries et al., 2008](#);  
95 [Muthukumaraswamy and Singh, 2013](#)). The frequency range of these oscillations (30-100 Hz)  
96 overlaps the broadband range, but the narrowband and broadband signals reflect biologically  
97 different processes ([Henrie and Shapley, 2005](#); [Miller et al., 2009b](#); [Ray and Maunsell, 2011](#); [Miller  
98 et al., 2014](#)). The ability to measure one does not imply the ability to measure the other.

99 Here, we sought to measure broadband signals quantitatively in the human brain using a non-  
100 invasive method (MEG). In order for this important, spike-dependent signal to be useful, it is  
101 necessary to measure it reliably in individual subjects, with a high SNR. A high SNR is essential if  
102 this signal will be widely used to study differences across stimuli, tasks, or groups. We developed a  
103 novel, automated MEG denoising algorithm adapted from prior fMRI work ([Kay et al., 2013](#)). Our  
104 experiments were designed to elicit spatially localized neural responses in visual cortex, and eye

105 movements were measured in a subset of subjects to test for possible confounds from non-neural  
106 sources.

## 107 **Methods**

### 108 **Data acquisition**

#### 109 **Subjects**

110 Eight subjects (five females), ages 20-42 years (M = 28.4 / SD = 6.7 years) with normal or  
111 corrected-to-normal vision participated in the NYU study. An additional 4 subjects (M = 27.0 / SD =  
112 7.4 years) participated in the same experiment at Center for Information and Neural Networks  
113 (CiNet), National Institute of Information and Communications Technology (NICT) in Osaka, Japan.  
114 Observers provided written informed consent. The experimental protocol was in compliance with  
115 the safety guidelines for MEG research and was approved by the University Committee on Activities  
116 involving Human Subjects at New York University and by the ethics committee of the National  
117 Institute of Information and Communications Technology (NICT).

#### 118 **Display**

119 Stimuli were generated using MATLAB (MathWorks, MA) and PsychToolbox ([Brainard, 1997](#); [Pelli,](#)  
120 [1997](#)) on a Macintosh computer. NYU: Images were presented using an InFocus LP850 projector  
121 (Texas Instruments, Warren, NJ) with a resolution of 1024 x 768 pixels and refresh rate of 60 Hz.  
122 Images were projected via a mirror onto a front-projection translucent screen at a distance of  
123 approximately 42 cm from the subject's eyes (field of view: 22 deg × 22 deg). The display was  
124 calibrated with the use of a LS-100 luminance meter (Konica Minolta, Singapore) and gamma-  
125 corrected using a linearized lookup table. CiNet: The display parameters were similar, except that  
126 the projector was PT-DZ680 (Panasonic, Japan), with 800 x 600 resolution and 60 Hz, and 61 cm  
127 viewing distance.

#### 128 **Stimuli**

129 The stimuli were contrast-reversing dartboard patterns (12 square wave contrast reversals per  
130 second), windowed within either a half circle (left or right visual field) or full circle (bilateral visual  
131 field) aperture, with a diameter of 22 degrees at NYU (26 degrees at CiNet). Mean luminance gray  
132 (206 cd/m<sup>2</sup> (NYU), 83 cd/m<sup>2</sup> (CiNet)) was used as background color for the dartboards and was  
133 shown in the full field during blank trials between stimulus periods (Figure 1).

#### 134 **Experimental design**

135 One *run* consisted of six seconds flickering 'on' periods, alternated with six seconds 'off' mean  
136 luminance periods, repeated 6 times (72 seconds). The order of the left-, right- or both-visual field  
137 apertures was random. There was a fixation dot in the middle of the screen throughout the run,  
138 switching between red and green at random intervals (averaging 3 seconds). The subjects were  
139 instructed to maintain fixation throughout the run and press a button every time the fixation dot  
140 changed color. The subjects were asked to minimize their blinking and head movements. After  
141 every 72-second run, there was a short break (typically 30-s to 1 minute). Each subject participated  
142 in 15 runs.

143

144

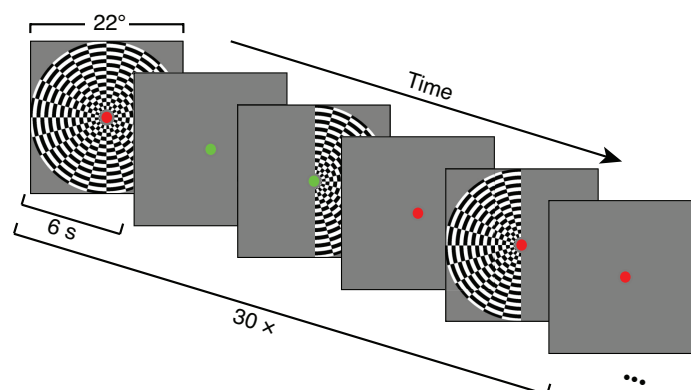

145  
146 **Figure 1. Overview of experimental design.** Large-field on-off stimuli were presented in 6-s blocks consisting of either  
147 both-, left-, or right-hemifield flicker, alternating with 6-s blocks of blanks (mean luminance). A run consisted of six  
148 stimulus and six baseline blocks, after which the observer had a short break. The figure shows the first half of one run.  
149 Within a run, the order of both-, left-, and right-field flickering periods was randomized. Fifteen runs were obtained per  
150 observer, so that there were 30 repetitions of each stimulus type across the 15 runs. The fixation dot is increased in size  
151 for visibility. Actual fixation dot was 0.17 degrees in radius (6 pixels).

## 152 MEG signal acquisition

153 Data for the main experiment were acquired continuously with a whole head Yokogawa MEG  
154 system (Kanazawa Institute of Technology, Japan) containing 157 axial gradiometer sensors to  
155 measure brain activity and 3 orthogonally-oriented reference magnetometers located in the dewar  
156 but away from the brain area, used to measure environmental noise. The magnetic fields were  
157 sampled at 1000 Hz and were filtered during acquisition between 1 Hz (high pass) and 200 Hz (low  
158 pass).

159 In a subset of subjects (S6-S8), eye movements were recorded by an EyeLink 1000 (SR Research  
160 Ltd., Osgoode, ON, Canada). Right eye position data were continuously recorded at a rate of 1000  
161 Hz. Calibration and validation of the eye position was conducted by having the subject saccade to  
162 locations on a 5-point grid. Triggers sent from the presentation computer were recorded by the  
163 EyeLink acquisition computer. The same triggers were recorded simultaneously by the MEG data  
164 acquisition computer, allowing for synchronization between the eye-tracking recording and MEG  
165 recording.

166 The 4 data sets acquired with an Elekta Neuromag at CiNet and were pre-processed in MATLAB  
167 (MathWorks, MA, USA) using the identical code and procedure. The CiNet data were acquired as  
168 102 pairs of planar gradiometer signals (204 sensors). Data were analyzed from each of the 204  
169 gradiometers separately and paired into 102 locations for mesh visualization (e.g., the broadband  
170 signal-to-noise-ratio for sensor 121 and 122 out of 204 would be averaged to show one signal-to-  
171 noise-ratio in the position of sensor 61 out of 102).

## 172 Data analysis

### 173 Reproducible computation and code sharing

174 All analyses were conducted in MATLAB. In the interest of reproducible computational methods,  
175 both the analysis code and the MEG data for all results reported in this paper will be publicly  
176 available via the Open Science Framework at the url <https://osf.io/c59sh/> (doi  
177 10.17605/OSF.IO/C59SH). Figures 2-15 (except 3) can be reproduced by running scripts from the  
178 GitHub repository of the form *dfdMakeFigure4.m*, or the master script *dfdMakeAllFigures.m*.

## 179 MEG preprocessing

180 For some analyses, data were environmentally denoised using published algorithms prior to any  
181 further analysis. This enabled us to compare data denoised with our new algorithm alone, or with  
182 our new algorithm following environmental denoising. For the NYU data, we used either of two  
183 algorithms. One was the continuously adjusted least-square method (CALM; [Adachi et al., 2001](#)),  
184 applied to data with a block length of 20 seconds (20,000 time samples). The second algorithm was  
185 time-shifted principal component analysis (TSPCA; [de Cheveigne and Simon, 2007](#)), with a block  
186 length of 20 seconds and shifts of up to +/- 100 ms in 1 ms steps. For the CiNet data, the  
187 environmental denoising algorithm was temporal signal space separation ('tSSS') (with default  
188 parameters, e.g. inside and outside expansion orders of 8 and 3, respectively; 80 inside and 15  
189 outside harmonic terms; correlation limit of 0.98).

190 The FieldTrip toolbox ([Oostenveld et al., 2011](#)) was used to read the data files (either  
191 environmentally-denoised or raw). For all subsequent analyses, custom code was written in  
192 MATLAB. Using either the environmentally-denoised data or raw data, the signals were divided into  
193 short epochs. Each stimulus type (left-, right-, or both-hemifield, or blank) was presented in 6-s  
194 blocks, and these blocks were divided into 6 non-overlapping 1-s epochs. We discarded the first  
195 epoch of each 6-s block to avoid the transient response associated with the change in stimulus.  
196 After epoching the data, we used a simple algorithm to detect outliers. We first defined a 'data  
197 block' as the 1-s time series from one epoch for one sensor. So a typical experiment consisted of  
198 ~170,000 data blocks (157 sensors x 1080 1-s epochs). We computed the standard deviation of the  
199 time series within each data block, and labeled a block as 'bad' if its standard deviation was more  
200 than 20 times smaller or 20 times larger than the median standard deviation across all data blocks.  
201 The time series for bad data blocks were replaced by the time series spatially interpolated across  
202 nearby sensor (weighting sensors inversely with the distance). Further, if more than 20% of data  
203 blocks were labeled bad for any sensor, then we removed the entire sensor from analysis, and if  
204 more than 20% of data blocks were bad for any epoch, then we removed the entire epoch from  
205 analysis. Typically, two to seven sensors and 2%-4% of the epochs were removed per session for  
206 the NYU data. For the CiNet datasets, almost no sensors or epochs were removed (one sensor and  
207 one epoch across all data sets). These preprocessing steps were implemented with  
208 [dfdPreprocessData.m](#).

## 209 Computation of stimulus locked and broadband responses

210 Data were summarized as two values per sensor and per epoch: a stimulus-locked and a broadband  
211 power value. These calculations were done by first computing the Fourier transform of the time  
212 series within each epoch (Figure 2A,B).

213 The stimulus-locked signal was then defined as the amplitude at the stimulus locked frequency (12  
214 Hz). The broadband response was computed as the geometric mean of the power across  
215 frequencies within the range of 60-150 Hz, excluding multiples of the stimulus locked frequency  
216 (see also Figure 2 AB). The geometric mean is the exponential of the average of the log of the signal.  
217 We averaged in the log domain because log power is better approximated by a normal distribution  
218 than is power, which is highly skewed. These two calculations converted the MEG measurements  
219 into a broadband and a stimulus-locked summary metric, each sampled once per second (Figure  
220 2C). The two summary metrics were computed by the functions [getstimlocked.m](#) and  
221 [getbroadband.m](#).

222 We then bootstrapped across epochs to compute confidence intervals on the signal estimates (per  
223 sensor and per condition). For each of 1000 bootstraps, we sampled  $n$  epochs with replacement,  
224 where  $n$  is the total number of epochs in the experiment. We then computed the average response  
225 across epochs for each stimulus condition, minus the average across blank epochs. This provided

226 one summary measure for each of the three stimulus conditions and each of the two dependent  
 227 measures (broadband and stimulus locked) for each of the 1000 bootstraps. Finally, we took the  
 228 median across bootstraps as the estimate of signal and half of the 68% confidence interval across  
 229 bootstraps as the estimate of the noise (Figure 2D,E). For some analyses, the ratio of these values  
 230 was defined as the signal-to-noise ratio (SNR).

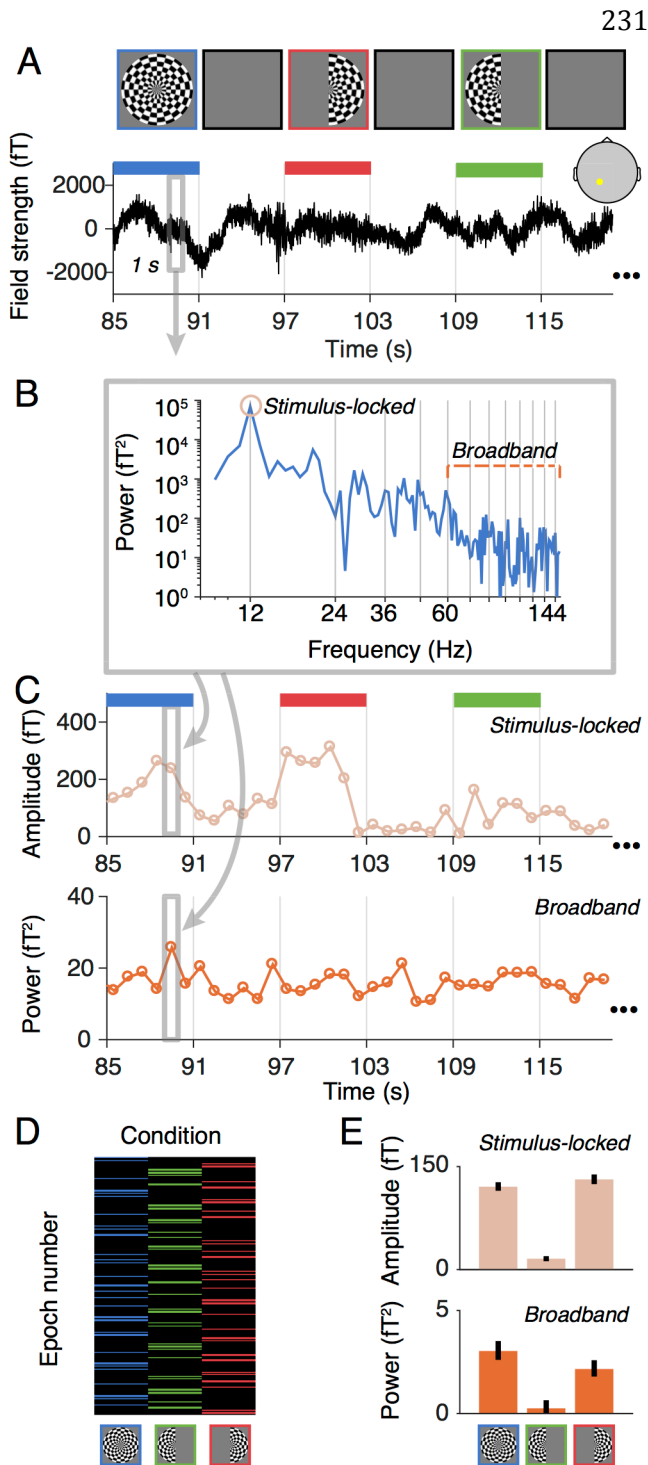

**Figure 2. Data analysis without denoising.** A. The time series for each sensor were epoched into non-overlapping one-second periods. BC. The time series in each epoch was fast Fourier transformed and then summarized as two values, a stimulus-locked value (amplitude of the fast Fourier component at the stimulus frequency), and a broadband value (mean of the log power of all frequencies from 60-150 Hz, excluding those within +/- 1 Hz of stimulus harmonics). D. The summary of conditions is shown as a matrix, where each column corresponds to one of the three stimulus conditions, and the number of rows is equal to the total number of epochs across the session. Rows with no color are blank epochs. E. Summary metrics were computed separately for the stimulus-locked values and broadband measures, yielding three measures per sensor per data type. The summary metric was the mean across condition minus the mean across blanks, bootstrapped 1000 times. The bar plot show the median and the 68% confidence interval based on 1000 bootstraps.

### MEG Denoise Algorithm

Extracranial measurements like MEG have multiple global noise sources and a relatively low signal-to-noise ratio compared to intracranial measures, especially for high frequency signals. In order to increase the signal-to-noise ratio, we developed a denoising technique that helps reveal the broadband signal of interest. A denoising algorithm developed for fMRI ('GLMdenoise'; (Kay et al., 2013)) was adapted for MEG to project out noise from the data for each epoch in each sensor. The logic behind the algorithm is that many sources of noise are global, and therefore spread across sensors. The algorithm identifies sensors that have no stimulus-related response (the 'noise pool'), and uses these sensors to define noise components. The noise components are then projected out from all sensor time series in each epoch.

275 *Noise pool selection*

276 The noise pool was defined as the 75 (NYU) or 100 (CiNet) sensors with the lowest stimulus-locked  
277 SNR across conditions. The SNR was computed by (a) dividing the median response across  
278 bootstraps by the variability across bootstraps (half of the 68% confidence interval) for each  
279 condition, and (b) taking the maximum of the three values (corresponding to the three stimulus  
280 conditions) for each sensor.

281 We used the stimulus-locked signal to identify the noise pool because this signal had a very high  
282 SNR, and could easily be measured prior to running our denoise algorithm, and because we  
283 assumed (and confirmed by inspection) that sensors with broadband responses also had stimulus-  
284 locked responses.

285 For most observers, most of the sensors in the noise pool were located over the front of the head  
286 (see for example Figure 3A).

287 *Filtering of time series*

288 As described above, the broadband summary metric was derived from power at a limited range of  
289 temporal frequencies (60-150 Hz, excluding multiples of the stimulus frequency). After defining the  
290 noise pool, the time series of all sensors in all epochs were filtered to remove signal at all  
291 frequencies not used to compute the broadband signal. Hence the remaining time series contained  
292 power only at frequencies defining the signal of interest. This step was important because the noise  
293 pool, though selected for a low stimulus-locked SNR, could nonetheless have contained a small,  
294 residual stimulus-locked signal. This residual signal would have been correlated with the  
295 experimental design (larger when stimuli were present than absent) and hence projecting it out of  
296 the data could have caused a systematic bias (see the script [denoisingProjectingInVariance.m](#)).

297 *PCA*

298 Following filtering, the next step in the algorithm was principal component analysis (PCA). This  
299 identified the common components of the time series across the sensors in the noise pool. PCA was  
300 computed separately for each 1-s epoch (Figure 3C). This means that denoising occurred at the  
301 same temporal scale (1 second) as the computation of the summary metrics. This differs from some  
302 denoising algorithms, in which noise regressors are identified over a much longer time period, e.g.,  
303 several minutes ([Vigario, 1997](#)). Denoising at a short-time scale can be advantageous if the spatial  
304 pattern of the noise responses is not consistent across the entire experiment. As a control  
305 comparison, we also ran our algorithm by identifying PC time series on the entire duration of the  
306 experiment (~20 minutes) rather than epoch by epoch. (See Results, 'Control analyses for MEG  
307 Denoise algorithm'.)

308 *Projecting out PCA components*

309 The first one to ten principal components (PCs) in each epoch were projected out of the time series  
310 for all sensors, using linear regression. This resulted in ten new data sets: One with PC 1 projected  
311 out, one with PC 1 and 2 projected out, etc. up to 10 PCs projected out (Figure 3D). After projecting  
312 out the noise components, we summarized the data into a stimulus-locked and broadband  
313 component as described in Figure 2.



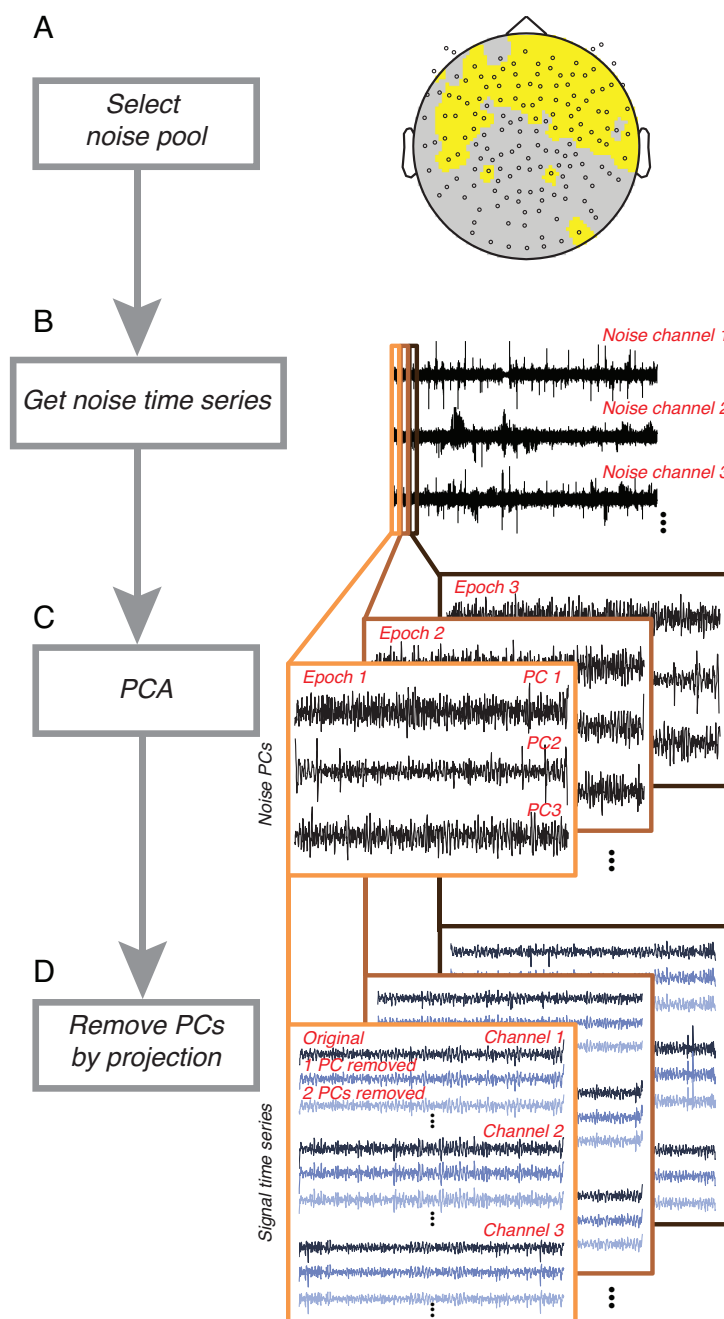

314

315

316 **Figure 3. Denoising procedure.** Following an estimate of response reliability computed from non-denoised data (Figure

317 2), the algorithm first selects a noise pool. **A.** The noise pool is comprised of sensors whose SNR from the evoked

318 (stimulus-locked) component falls below a threshold. **B.** The time series from each sensor in the noise pool is then

319 filtered to remove components that do not contribute to the broadband computation. **C.** Principal component analysis is

320 then computed within each epoch. **D.** for each epoch, the first  $n$  PCs are projected out from the time series of all sensors,

### 321 **Statistical comparisons**

322 To assess the effect of the MEG Denoise algorithm on the broadband SNR, we compared the  
323 broadband SNR after applying MEG Denoise to the broadband SNR either without denoising or after  
324 applying other denoising algorithms. To make these comparisons, we first identified 10 sensors of  
325 interest from each subject. These sensors of interest were the 10 with the highest SNR in any of the  
326 three stimulus conditions, either before or after denoising, excluding sensors from the noise pool.  
327 For each of the three stimulus conditions, we then took the average SNR from these 10 sensors  
328 without denoising or after applying MEG Denoise or another denoising algorithm. Finally, we  
329 conducted two-tailed t-tests, paired by subject (n=8), between the broadband SNR after MEG  
330 Denoise to the broadband SNR without denoising (or with another algorithm). The t-tests were  
331 conducted separately for each of the three stimulus conditions (both-hemifield, left-hemifield, and  
332 right-hemifield).

### 333 **Control analyses**

334 To investigate the validity of our algorithm, we ran multiple control analyses. In particular, it is  
335 important to rule out the possibility that the denoising algorithm produces significant results even  
336 when the data contains no sensible signal. To test this, we compared the difference in SNR of  
337 denoised data with the following controls: (1) phase-scrambling the PC time series, and (2) using all  
338 sensors to define the noise with PCA rather than only a subset of sensors that have little to no  
339 stimulus-locked signal. We also assessed the effect of identifying and projecting out PC time series  
340 equal in length to the entire experiment (~20 minutes), rather than PC time series matched in  
341 length to our analysis epochs (1-s). This comparison tested the assumption that denoising in  
342 shorter epochs was advantageous, possibly due to the pattern of noise sources differing over the  
343 course of the experiment.

### 344 **Eye tracking analysis**

345 Since an increase in microsaccade rate can induce broadband spectral components in extracranial  
346 measurements such as EEG or MEG ([Yuval-Greenberg et al., 2008](#); [Keren et al., 2010](#)), we checked in  
347 three NYU subjects (S6-S8) whether there was a difference in rate between the 'off' baseline  
348 periods and 'on' stimulus periods, and within the three stimulus (both-, right-, left-hemifield)  
349 conditions. Microsaccades were identified as changes in position with above a relative velocity  
350 threshold ( $6^\circ/\text{s}$ ) and a minimum duration of 6 ms, as reported in Engbert & Mergenthaler ([2006](#)) to  
351 analyze rate and direction of microsaccades as well as separating MEG data into epochs that did and  
352 did not contain microsaccades.

## 353 Results

354 A large field ‘on-off’ stimulation experiment was used to characterize the stimulus-locked (steady  
355 state evoked field, ‘SSVEF’) and broadband responses in visual cortex measured with MEG. The two  
356 measures are reported below, both prior to and after applying our new denoising algorithm.

### 357 Stimulus-locked and broadband signals measured with MEG

358 In each stimulus condition (left-, right-, and both-hemifield), the stimulus contrast reversed 12  
359 times per second, so the stimulus-locked signal was measured at 12 Hz and harmonics. Because the  
360 largest component was at 12 Hz, we defined the stimulus-locked signal for a particular stimulus  
361 condition as the amplitude at 12 Hz, averaged over all 1-second epochs with that stimulus (typically  
362 ~180 epochs) computed for each of the 157 sensors in each subject (Figure 4; see Methods for  
363 details). The broadband signal was computed by averaging the log power across frequencies  
364 between 60 and 150 Hz, excluding multiples of the stimulus frequency (12 Hz), and then  
365 exponentiating the mean (Figure 4 inset; see Methods for details).

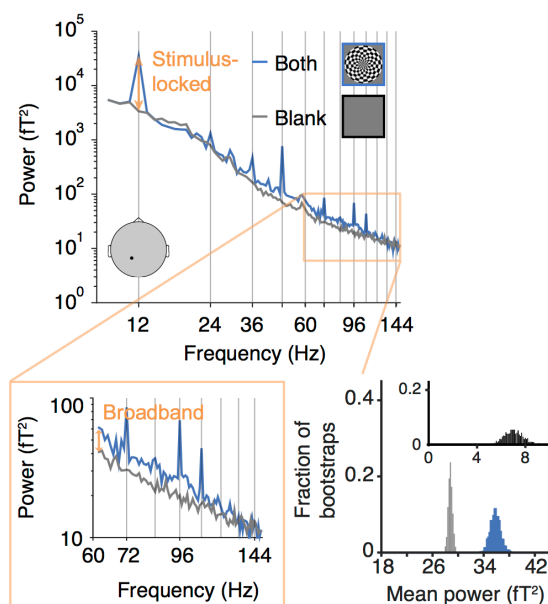

366 **Figure 4. Example response to flickering large-field stimulus.** The main panel plots the spectral power, averaged  
367 across 180 1-s epochs, during which the subject viewed either the both-hemifield stimulus (blue line) or a blank screen at  
368 mean luminance (gray line). The black dot on the schematic head indicates the location of the sensor. The peak at 12 Hz  
369 corresponds to the frequency of dartboard contrast reversals, and is a measure of the stimulus-locked component (orange  
370 arrow). The lower inset zooms in on higher frequencies to emphasize the broadband component, most evident in this  
371 example data set as a spectral power elevation spanning 60 to 150 Hz. The increase in the broadband response of the  
372 stimulus condition relative to the blank condition is shown by the orange arrow. The histograms on the right show the  
373 broadband level separately for the stimulus condition (blue) and the blank condition (gray), and the difference between  
374 them (black), computed 1000 times by bootstrapping over epochs in the experiment. Data from subject S1. Made with  
375 function *dfdMakeFigure4.m*.  
376

377 Both the stimulus-locked and broadband signals were largest in medial, posterior sensors, as  
378 expected from activations in visual cortex ([Seki et al., 1996](#)). For the stimulus-locked signal, the  
379 both-hemifield condition tended to produce broadband signals in bilateral posterior sensors,  
380 whereas the single-hemifield conditions produced responses that were lateralized, with higher SNR  
381 contralateral to the stimulus. This pattern could be seen in an example subject and in the average  
382 across subjects (Figure 5). The lateralization of the stimulus-locked signal was less clear in the  
383 average across subjects due to imperfect alignment of the sensors showing the largest differential

384 response to the left- and right- hemifield stimuli. In each of the 8 individual subjects and in each of  
385 the 3 conditions, the stimulus-locked response was evident, with the signal at least 10x above the  
386 noise (data not shown).

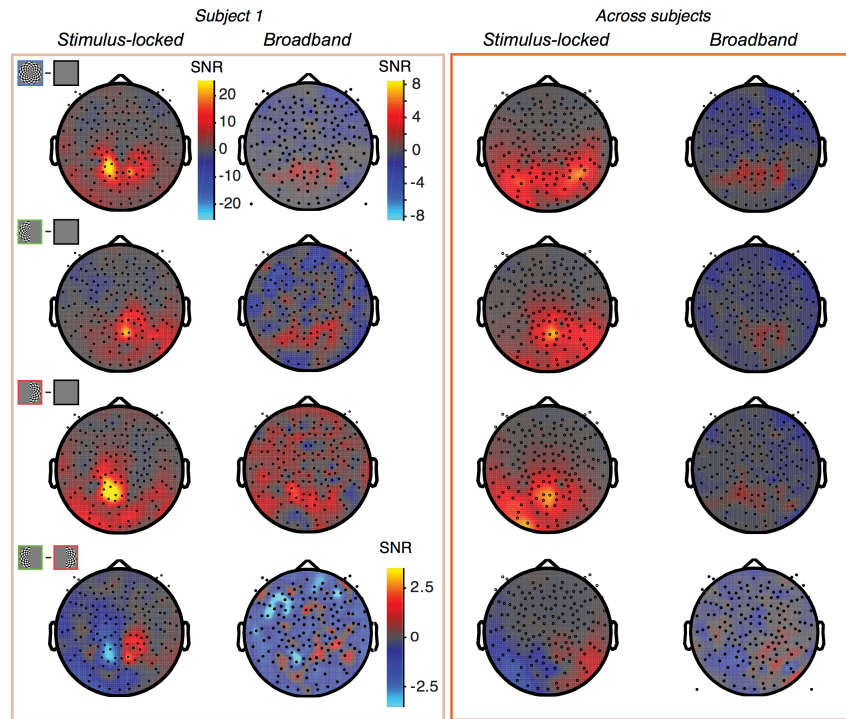

387  
388 **Figure 5. Topographic map of stimulus-locked and broadband responses.** Data from subject S1 (left) and averaged  
389 across subjects S1-S8 by sensor (right). The top 3 rows show data from the 3 stimulus conditions (both-, left-, and right-  
390 hemifield) compared to blank, and the lower row shows data as the left-only minus right-only conditions. The dependent  
391 variable plotted for the single subject data is the signal-to-noise ratio at each sensor, computed as the mean of the  
392 contrast (stimulus minus blank) across bootstraps divided by the standard deviation across bootstraps (bootstrapped  
393 over epochs). For the group data, the signal-to-noise ratio is the mean of the subject-specific SNRs at each given sensor.  
394 The same scale bar is used for all stimulus-locked plots. For the broadband plots, one scale bar is used for the first three  
395 rows, and a different scale bar with a smaller range is used for the fourth row. Made with *dfdMakeFigure5.m*.

396 The spatial pattern of broadband signals was qualitatively similar to the spatial pattern of the  
397 stimulus locked signal, with bilateral posterior responses in the both-hemifield condition, and  
398 lateralized responses in the single-hemifield conditions (Figure 5, individual example and group-  
399 averaged data). However, the broadband responses had much lower signal-to-noise than the  
400 stimulus-locked responses, and in many of the individual subjects, broadband was not evident in  
401 one or more conditions (data not shown). The broadband responses were less reliable for the left-  
402 and right-hemifield conditions than for the both-hemifield conditions.

403 The fact that broadband responses were evident in a few subjects in some conditions indicates that  
404 it is possible to measure broadband fields with MEG. However, if this signal cannot be measured  
405 reliably in many subjects and many conditions, then the practical value of measuring broadband  
406 with MEG is limited. This motivated us to ask whether denoising the MEG data could unmask  
407 broadband signals, making it more reliable across subjects and stimulus conditions.

408

## 409 Denoising increases the broadband SNR by reducing variability

410 The MEG data were denoised using a new algorithm as described in detail in the Methods section.  
411 In brief, for each subject a subset of sensors that contained little to no stimulus-locked responses  
412 were defined as the noise pool. Once the noise-pool was defined, the time series in each sensor and  
413 in each epoch was filtered to remove all signals not contributing to the broadband measurement.  
414 Global noise regressors were then derived by principal component analysis from the filtered time  
415 series in the noise pool in each 1-s epoch. The first 10 PCs were projected out of the data in each  
416 sensor, epoch by epoch. The remainder of the analysis was identical to that used in the non-  
417 denoised data set (Figure 2).

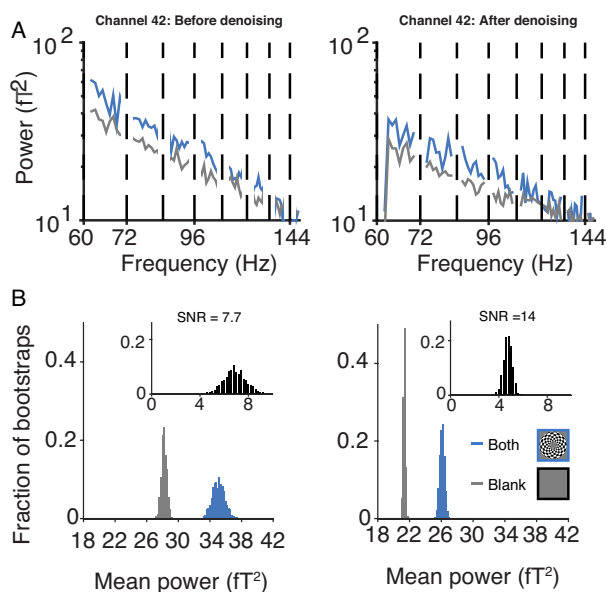

418

419 **Figure 6. Effect of denoising on broadband response.** (A) The upper panel shows the power spectra from sensor 42,  
420 subject 1, averaged across 178 epochs with the both-hemifield stimulus (blue) and blank screen (gray). The left panel is  
421 prior to denoising and is identical to the inset in figure 4, except that harmonics of stimulus-locked frequencies have been  
422 removed. The right panel is the same as the left, except after denoising. (B) The lower panel shows the distributions of the  
423 bootstrapped broadband power for the both-hemifield (blue), blank (gray), and both-hemifield minus blank (black, inset),  
424 prior to denoising (left) and after denoising (right). The SNR is defined as the median of the difference distribution  
425 divided by half of the 68% confidence interval in the difference distribution (7.7 prior to denoising, 14.0 after). The effects  
426 of denoising are to reduce the mean power, and more importantly, reduce the standard deviation across epochs. Made  
427 with *dfdMakeFigure6.m*.

428 We first illustrate the effect of denoising with an example from a single sensor in one subject  
429 (Figure 6). This sensor showed a broadband response both prior to, and after, denoising. The  
430 benefit of denoising was not evident when comparing the mean power spectra before and after  
431 denoising (Figure 6A). Denoising did not reduce the variability in power across frequencies, nor did  
432 it increase the separation in the spectra for the contrast stimulus and the blank. Instead, the effects  
433 of denoising are better appreciated by examining the variability across epochs rather than across  
434 frequencies (Figure 6B). The biggest effect is that the broadband power estimates became less  
435 variable across epochs, both for the blank condition and the stimulus condition. This is indicated by  
436 the narrower distributions in the response amplitudes for the two conditions (Figure 6B, main  
437 panels) and for the difference between conditions (Figure 6B, insets). The standard deviation of the  
438 difference distributions decreased more than two-fold (from 0.79 to 0.35) as a result of denoising.

439 There are two other secondary patterns evident in these distributions. First, the mean broadband  
440 power of both the blank and stimulus condition decreased as a result of denoising (for the both-  
441 hemifield condition, 35.8 versus 26.1, prior to versus after denoising; for the blank, 28.7 versus  
442 21.4). This was expected because projecting out signal reduces power. Second, the contrast  
443 between the two conditions (difference between the means) reduced: 7.0 prior to denoising versus  
444 4.8 after denoising. The combination of these two effects was that the *percent difference* was little  
445 changed, with broadband power from the contrast-stimulus about 25% more than for the blank  
446 before and after denoising. Hence denoising did not increase the estimate of the percent signal  
447 change.

448 It is important to consider how these effects interact. Because the reduction in variability across  
449 epochs was the biggest effect of denoising (more than 2-fold), there was more than a doubling of  
450 SNR, computed as the median divided by the variability of the difference distribution<sup>1</sup>. In sum, the  
451 spectral plots show that the variability in power *across frequencies* was little affected by denoising  
452 (Figure 6A), whereas the distribution plots show that the variability in total broadband power  
453 *across epochs* was reduced considerably (Figure 6B).

454 We now consider the effect of denoising across sensors, subjects, and stimulus conditions.  
455 Projecting out noise PCs substantially increased the signal-to-noise ratio of the broadband  
456 measurement in visually responsive sensors. For example, in the both-hemifield condition for  
457 subject S1, the median SNR of the 10 most visually responsive sensors increased from 5 to 10 after  
458 denoising (Figure 7A, blue solid line), similar to the example sensor shown earlier (Figure 6B). In  
459 contrast, the SNR of the 75 sensors in the noise pool was relatively unaffected by denoising (Figure  
460 7A, blue dashed line). This was expected because sensors in the noise pool were unlikely to  
461 distinguish stimulus from blank. Across the 8 subjects in the both-hemifield condition, taking the  
462 mean of the 10 most visually responsive sensors for each subject, the SNR increased about 3-fold  
463 (from 1.6 to 5.0), with a numerical increase in every subject (Figure 7B). Because the SNR stabilized  
464 in all subjects with 10 or fewer PCs projected out, in subsequent analyses, for simplicity we report  
465 the effects of denoising with exactly 10 PCs. A comparison of the SNR before denoising (0 PCs  
466 projected out) and after (10 PCs projected out) summarized across all subjects and the three  
467 stimulus conditions shows increases in SNR for every subject in all conditions (Figure 7C)  
468 ( $p=0.0001$ ,  $p=0.0007$ ,  $p=0.0022$  for two-tailed t-tests, 0 v 10 PCs, for both-, left-, and right-hemifield  
469 conditions, respectively).

470

---

<sup>1</sup> There are many ways to define 'signal', 'noise', and therefore the signal-to-noise-ratio ('SNR'). Here we define **signal** as the difference in broadband power between a condition of interest and blank, and we define **noise** as the variability in the signal estimate when we bootstrap over epochs (half of the 68% confidence interval). According to these definitions, denoising caused the signal in the example sensor to go down, and the noise to go down even more, and hence the **SNR** went up. Alternatively, one could define signal as the percent increase over baseline. By this definition, signal was about 25% before *and* after denoising in the example sensor. One could also define the signal as the broadband power of a single condition without subtracting the baseline. By this definition, denoising caused the full-field stimulus signal to go down, and the blank stimulus signal to go down. By this alternate definition, denoising almost always causes a signal decrease, because denoising projects out regressors, which tends to remove power.

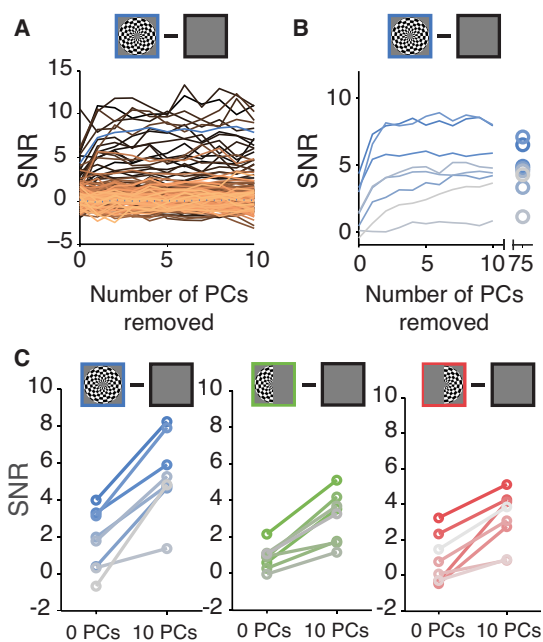

471  
 472 **Figure 7. Effect of denoising on broadband SNR.** (A) SNR as a function of the number of PCs projected out in subject S1  
 473 for the both-hemifield stimulus. Each line is one sensor. The heavy blue line is the mean of the 10 sensors with the highest  
 474 SNR, as measured either before or after denoising. (B) SNR as a function of PCs projected out in each of 8 subjects for the  
 475 both-hemifield stimulus. Each line is the mean across the 10 sensors with the highest SNR in one subject. The rightmost  
 476 points indicate the effect of projecting out all 75 PCs. (C) SNR before denoising (0 PCs projected out) and after denoising  
 477 (10 PCs projected out) for each stimulus condition. Each line is the mean of the 10 sensors with the highest SNR for one  
 478 subject in one stimulus condition. Color saturation corresponds to the subject number (highest to lowest saturation,  
 479 subjects 1-8, respectively). Made with *dfdMakeFigure7.m*.

480 In principle, the SNR increases could have arisen from increased signal, decreased noise, or both. To  
 481 distinguish among these possibilities, we compared the signal level alone and the noise level alone  
 482 before and after denoising. As in prior results, the signal was defined as the difference in broadband  
 483 power between the contrast pattern and the blank (median across bootstraps), and the noise was  
 484 defined as the variability of this difference metric (half of the 68% confidence interval across  
 485 bootstraps). For all three stimulus conditions in most subjects, the signal was largely unaffected by  
 486 denoising, staying at a similar level or decreasing slightly, while the noise level went down  
 487 substantially (Figure 8). These analyses indicate that the increase in SNR from denoising (Figure 7)  
 488 was caused by a reduction in epoch-to-epoch variability of the broadband signal level, and not by an  
 489 increase in the signal level, consistent with the results of the single example sensor (Figure 6).  
 490 Expressed as a percentage increase over baseline, the broadband response to the both-hemifield  
 491 stimulus after denoising was  $\sim 10.9 \pm 1.7\%$  averaged across the top 10 sensors in each subject (mean  
 492  $\pm$  sem across subject), and  $12.6\% \pm 1.6\%$  for the top 5 sensors. This contrasts with the much larger  
 493 stimulus-locked response, which was a nearly 8-fold increase over baseline even prior to denoising  
 494 ( $678\% \pm 226\%$  increase over baseline for the top 5 sensors).

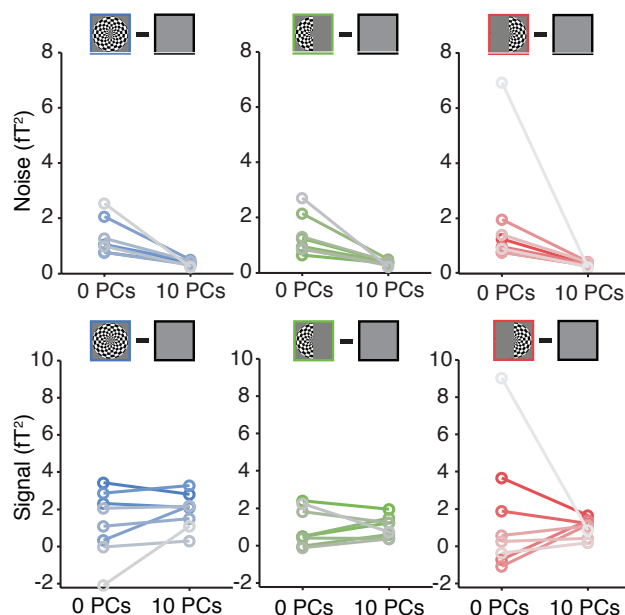

495  
496 **Figure 8. Effect of denoising on the broadband signal and noise.** Noise (upper) and signal (lower) before and after  
497 denoising in each of three stimulus conditions. Plotting conventions as in Figure 7c. Made with *dfdMakeFigure8.m*.

498 The effect of denoising the broadband signal was not uniform across the sensor array. In general,  
499 sensors where we expected visual activity (over the posterior, central part of the head) showed  
500 increased SNR following denoising. In the example subject S1 as well as the average across subjects,  
501 the denoised broadband response was observed in bilateral sensors for the both-hemifield  
502 condition, and with a contralateral bias (relative to the midline) in the two lateralized conditions  
503 (Figure 9). For the both-hemifield stimulus, broadband responses were evident in sensors over the  
504 posterior, middle of the head in most individual subjects (Figure 10).



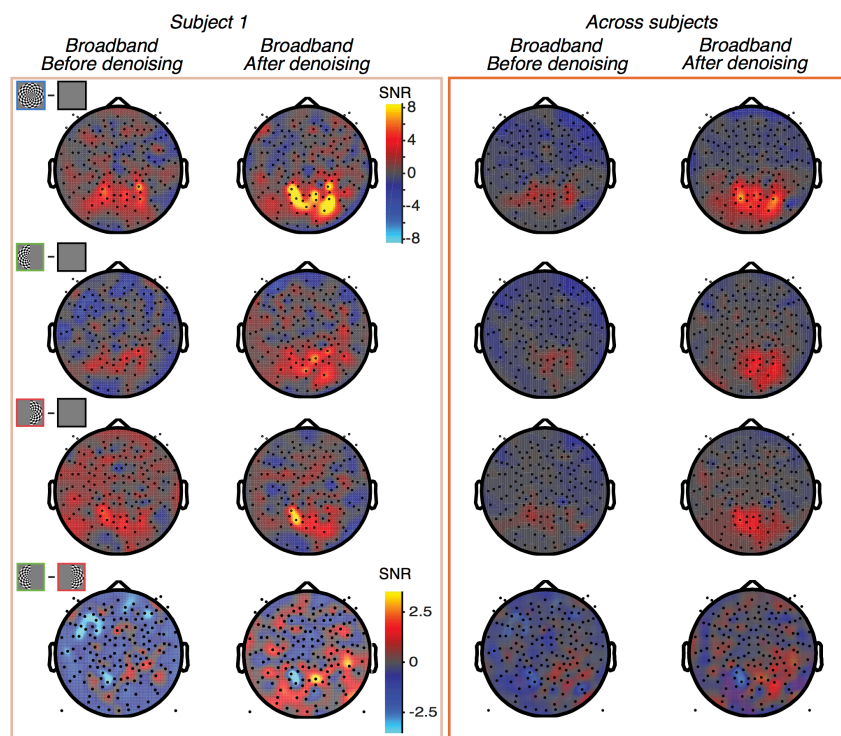

505  
506 **Figure 9 Topographic map of broadband SNR before and after denoising.** Data from subject S1 (left) and averaged  
507 across subjects S1-S8 by sensor (right). The top 3 rows show data from the 3 stimulus conditions (both-, left-, and right-  
508 hemifield) and the fourth row shows the difference between the left-only and right-only conditions. The fourth row uses a  
509 different scale bar from the other 3 rows. The columns show data before and after denoising. Made with  
510 *dfdMakeFigure9.m*.

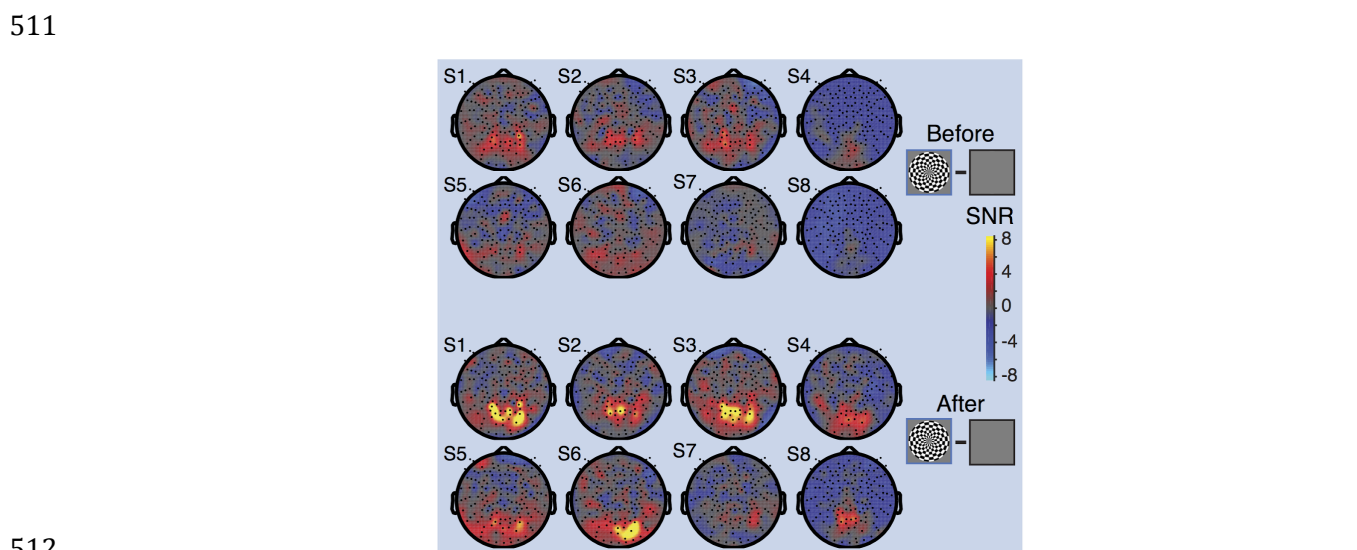

512  
513 **Figure 10 Topographic maps of broadband SNR in individual subjects after denoising.** Head plots show the SNR for  
514 the both-hemifield stimulus, before denoising (above) and after denoising (below). Made with *dfdMakeFigure10.m*.

515

## 516 Control analyses for MEG Denoise algorithm

517 To validate the assumptions in our denoising algorithm, we ran three control analyses. In one  
518 control analysis, we concatenated all epochs to derive noise regressors from the whole  
519 experimental time series (Figure 11, 2<sup>nd</sup> bar, compared to using the default of 1-s epochs to derive  
520 noise regressors – 1<sup>st</sup> bar). The elevation in broadband SNR was significantly less when we  
521 concatenated all epochs ( $p = 0.0016$ ,  $p = 0.0023$  and  $p = 0.0447$ , for the three stimulus conditions  
522 respectively). In the second control analysis, the noise pool included all sensors rather than only  
523 those sensors that were not visually responsive. Here, the noise regressors included some signal as  
524 well as noise, and hence should be of less benefit. This expectation was confirmed, in that there was  
525 no increase in SNR when the algorithm was run with the omission of the noise-pool-selection step  
526 (Figure 11, 3<sup>rd</sup> bar,  $p = 0.0014$ ,  $p = 0.0015$  and  $p = 0.0020$  for the three stimulus conditions  
527 respectively). In a 3<sup>rd</sup> control analysis, we phase-scrambled each of the epoch-by-epoch noise time  
528 series. The phase-scrambled regressors were temporally uncorrelated with the actual time series in  
529 the noise. As a result, we found no change in SNR levels (Figure 11, fourth bar,  $p = 0.0001$ ,  $p =$   
530  $0.0003$  and  $p = 0.0017$ ).

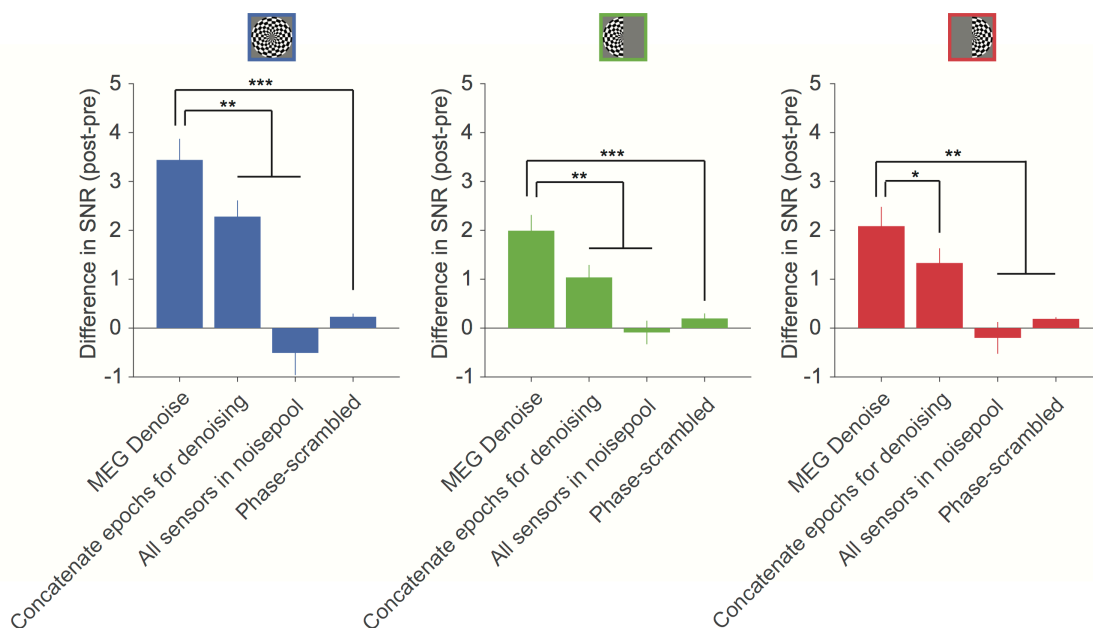

531

532 **Figure 11. Comparison of MEG Denoise to control analyses.** When the denoising algorithm derives noise regressors  
533 from the whole experimental time series ('Concatenate epochs for denoising'), the amount of SNR gain is significantly less  
534 than the standard MEG Denoise (regressors derived separately from each 1-s epoch). When the noise regressors are  
535 derived from all sensors ('All sensors in noisepool'), or when the time series of the regressors are phase-scrambled, there  
536 is little or no change in SNR for all three stimulus conditions. Statistical significance is computed by a 2-tailed t-test,  
537 paired by subject, between denoising analyses. Statistical significance is indicated by \* =  $p < 0.05$ , \*\* =  $p < 0.01$ , \*\*\* =  $p <$   
538  $0.001$  between the MEG Denoise algorithm and each of the other controls. Made with *dfdMakeFigure11.m*.

## 539 Other denoising algorithms

540 To assess how other existing denoising algorithms affect our measurement of broadband power,  
541 and how they interact with our new denoising algorithm, we ran two different denoising  
542 algorithms, either alone or in combination with MEG Denoise. The two algorithms we tested were  
543 CALM, or continuously adjusted least-square method (Adachi et al., 2001) and TSPCA, or time-shift  
544 principal component analysis (de Cheveigne and Simon, 2007). Both of these make use of reference  
545 MEG sensors which face away from the head and measure environmental rather than physiological

546 fields. By design, these algorithms project out time series from the subspace spanned by the  
 547 reference sensors, thereby reducing environmental noise, but not physiological noise. Applying  
 548 either one of these two algorithms alone to the 8 data sets reported above increased the broadband  
 549 signal-to-noise ratio, evident in the group-averaged sensor plots (Figure 12A, columns 3-4 versus  
 550 column 2), and the increased SNR in the 10 most responsive sensors (Figure 12B, 2<sup>nd</sup> and 3<sup>rd</sup> bar  
 551 versus 1<sup>st</sup> bar in each plot).

552 In planned comparisons, we evaluated the SNR increase of each algorithm or combination of  
 553 algorithms to the increase from MEG Denoise alone. The increase from each of the two  
 554 environmental algorithms alone was significantly less than that from our new MEG Denoise  
 555 algorithm (Figure 12A, column 5 versus columns 3-4; Figure 12B, 4<sup>th</sup> bar versus 2<sup>nd</sup> and 3<sup>rd</sup>).  
 556 Applying two algorithms in sequence, first either CALM or TSPCA, followed by MEG Denoise, also  
 557 resulted in a large increase in broadband SNR (Figure 12A, columns 6 and 7). For all three stimulus  
 558 conditions, the combination of MEG Denoise and CALM resulted in the largest gain in SNR,  
 559 significantly larger than MEG Denoise alone for two out of the three conditions (Figure 12B, 5<sup>th</sup>  
 560 versus 4<sup>th</sup> bars). This indicates that the MEG Denoise algorithm and an environmental algorithm  
 561 captured some independent noise.

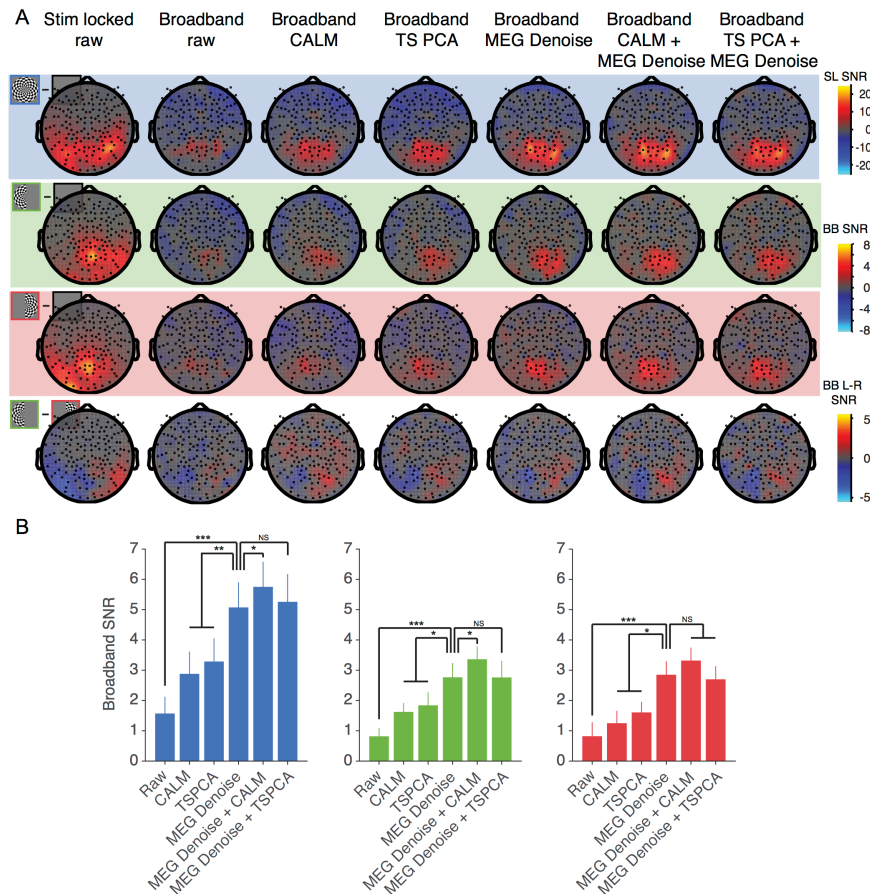

562  
 563 **Figure 12. Comparison of different denoising algorithms on NYU datasets (averaged across subjects S1-S8).** (A)  
 564 The columns represent SNR values for the stimulus locked signal (column 1), broadband signal without denoising  
 565 (column 2), and broadband signal with one or more denoising algorithms. One scale bar is used for all stimulus locked  
 566 plots (column 1). A second scale bar is used for all broadband plots (columns 2-7) except for the Left minus Right plots  
 567 (row 4, columns 2-7). Other details as in Figure 5. (B) Broadband SNR using different algorithms for both-hemifield (left),  
 568 left-hemifield (center) and right-hemifield (right) stimuli. Each bar is the change in SNR from baseline (column 2 in panel  
 569 A), averaged across the top 10 sensors per subject (mean +/- SEM across subjects). Top sensors were defined as the 10

570 sensors from each subject with the highest SNR across any of the 3 stimulus conditions and any of the denoising  
571 algorithms (columns 2-7). Statistical significance computed and indicated as in Figure 11. Made with *dfdMakeFigure12.m*.

## 572 Effect of denoising on stimulus locked SNR

573 In a separate analysis, we ran the MEG Denoise algorithm to evaluate its effect on the stimulus  
574 locked signal. The methods were identical to those used to denoise the broadband signal except for  
575 the omission of one step, the step in which we filtered the time series to remove temporal  
576 components that do not contribute to the broadband signal. Denoising modestly increased the  
577 stimulus-locked SNR for all stimulus conditions for most subjects (Figure 13, top). The SNR  
578 increased numerically in all subjects ( $n=8$ ) and in all stimulus conditions, although the percentage  
579 increases were smaller than those for denoising the broadband signal,  $\sim 20\%$  increase compared to  
580 two-fold. As in the case of denoising the broadband signals, the main contribution to the increase in  
581 SNR for the stimulus-locked signal was a decrease in variability across epochs (Figure 13, bottom),  
582 rather than an increase in the signal level (Figure 13, middle).

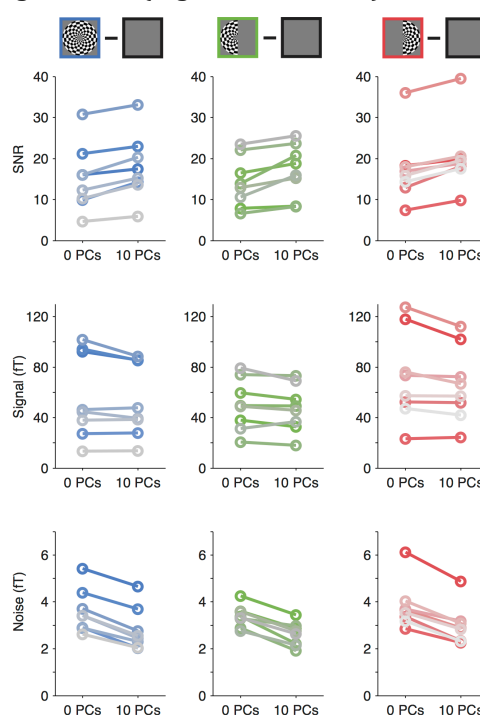

583  
584 **Figure 13. Denoising the stimulus-locked signal.** The MEG Denoise algorithm results in a modest increase in SNR for  
585 most subjects in all three stimulus conditions (top row). This benefit is largely due to the fact that the noise level goes  
586 down from denoising (middle bottom) rather than the signal increasing (middle row). Plotting conventions as in Figure 7c  
587 and Figure 8. Made with *dfdMakeFigure13.m*.

## 588 Broadband fields measured with Elekta 360 Neuromag

589 To test whether the findings reported above generalize to other instruments and experimental  
590 environments, we conducted the same experiment using a different type of MEG system, an Elekta  
591 360 Neuromag at CiNet. The CiNet system contains paired planar gradiometers, in contrast to the  
592 axial gradiometers used in the Yokogawa MEG at NYU, and the scanner is situated in a different  
593 physical environment, with potentially very different sources of environmental noise. The pre-  
594 processing pipeline at this imaging center often includes a denoising step based on temporally  
595 extended signal source separation (tSSS) (Taulu and Simola, 2006; Taulu and Hari, 2009). This  
596 additional experiment gave us the opportunity to ask several questions: (1) Are broadband fields

597 observed with a different MEG sensor type and different physical environment? (2) Does the tSSS  
598 algorithm increase the broadband SNR? (3) Does our new MEG Denoise algorithm increase the SNR  
599 of data that have already been denoised with the tSSS algorithm?

600 The identical experiments were conducted with 4 new subjects. As expected, all three stimulus  
601 types led to a large stimulus-locked response in the posterior sensors, with a peak SNR of more  
602 than 10 in the group averaged data (Figure 14A, column 1). A modest, spatially specific broadband  
603 signal was measured from the undenoised data for each stimulus type (Figure 14A column 2), with  
604 a peak SNR of 1-2 in the group-average data for all three conditions. Unlike the NYU data, in the  
605 CiNet data the MEG Denoise algorithm on the raw data did not generally result in an increase in the  
606 broadband SNR (group data, Figure 14A, columns 2 and 3; individual subjects, Figure 14B, left side  
607 of each subplot). However, when the raw data were pre-processed with the tSSS algorithm (Figure  
608 14A, column 4), application of MEG Denoise increased the SNR in all 3 stimulus conditions for 3 out  
609 of 4 subjects, and in 2 out of 3 stimulus conditions for the 4th subject. Together, the MEG Denoise  
610 algorithm increased the SNR by 2-3 fold, similar to the NYU data (both-hemifield: 2.8 to 5.6; left-  
611 hemifield: 0.8 to 2.4; right-hemifield: 2.01 to 4.4; means across subjects 1-4, top 10 sensors each, for  
612 the tSSS data and the MEG Denoised tSSS data). Just as with the NYU MEG data set, the combination  
613 of an algorithm tailored to find environmental noise (tSSS) and our algorithm produced the most  
614 robust results, indicating that MEG-denoise and the environmental denoising algorithm removed at  
615 least some independent sources of noise.

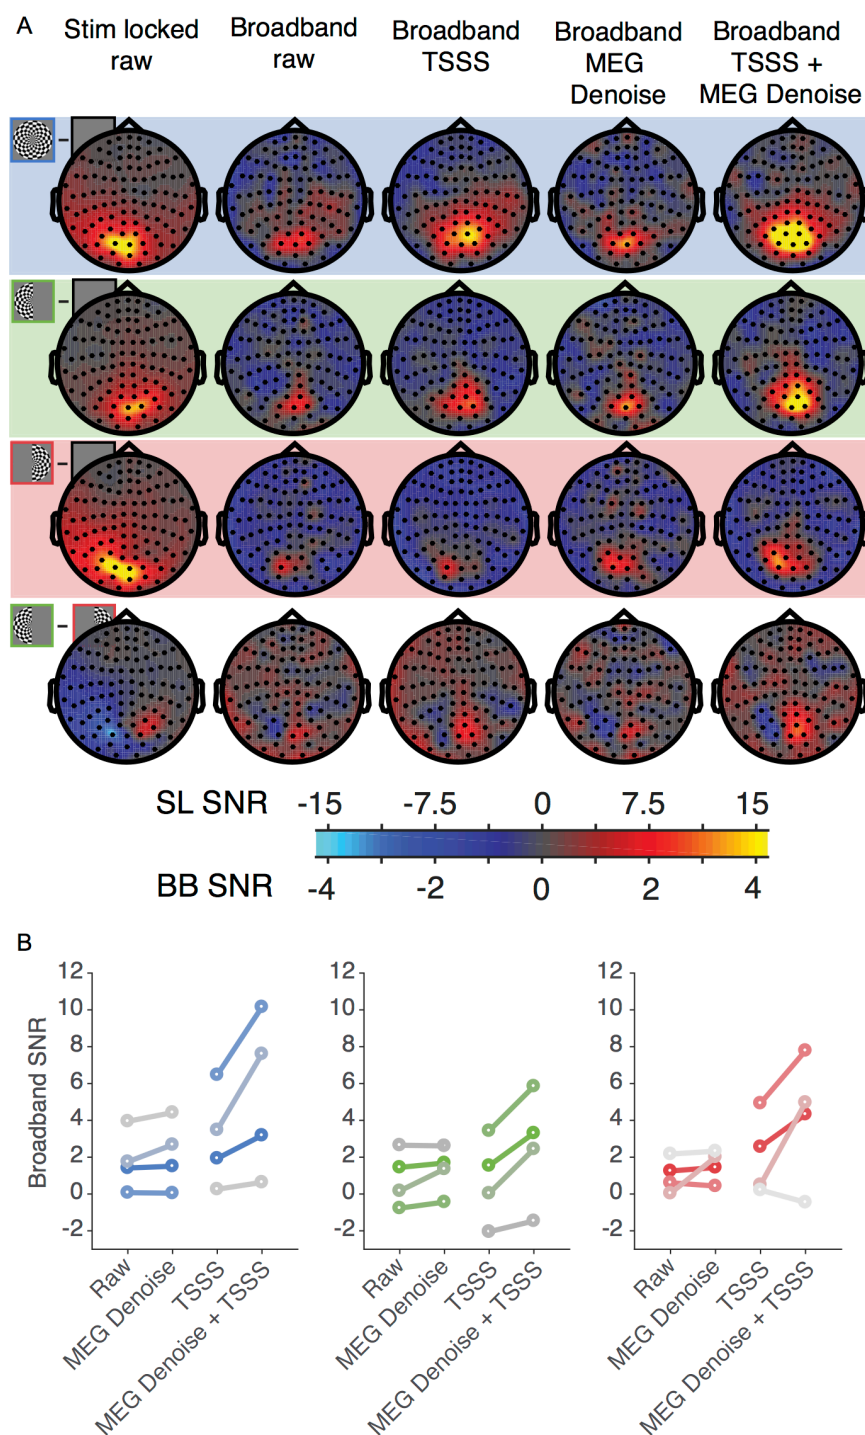

616  
 617 **Figure 14. MEG data from CiNet Neuromag.** (A) All plots show data averaged across new 4 subjects (S9-S13) in sensor  
 618 space (sensor-wise mean of the subject SNR). The columns represent SNR values for the stimulus locked signal (column  
 619 1), broadband signal without denoising (column 2), and broadband signal with one or more denoising algorithms. The  
 620 same scale bar is used for all broadband data (columns 3 - 5). Other details as in Figure 5. (B) Broadband SNR using  
 621 different algorithms for both-hemifield (left), left-hemifield (center) and right-hemifield (right) stimuli. Each line is  
 622 average broadband SNR across the top 10 sensors for one individual. Top sensors were defined as the 10 sensors from  
 623 each subject with the highest SNR across any of the 3 stimulus conditions and any of the denoising algorithms (columns 2-  
 624 6). Made with *dfdMakeFigure14.m*.

## 625 **Saccadic eye movements during MEG experiments**

626 Saccadic eye movements are known to have a large influence on MEG and EEG measurements. This  
627 influence can be especially pernicious when measuring high frequency broadband signals, because  
628 the spike field (MEG) or spike potential (EEG) arising from extraocular muscle contraction can be  
629 spectrally broadband and can co-vary with task design; hence, it can easily be confused with  
630 broadband signals arising from brain activity ([Yuval-Greenberg et al., 2008](#); [Yuval-Greenberg and  
631 Deouell, 2009](#)). For visual experiments, the spike potential in EEG is especially problematic because  
632 it tends to affect sensors which are also visually sensitive (posterior middle). In contrast, the MEG  
633 spike field is lateral, potentially influencing temporal and frontal sensors, with little to no effect on  
634 posterior sensors ([Carl et al., 2012](#)). Hence spike field artifacts are unlikely to contaminate our  
635 visually elicited broadband signals, which are most clearly evident in the central posterior sensors.

636 Nonetheless, for a subset of subjects (S6-S8), we measured eye movements during the MEG  
637 experiments and quantified the frequency of microsaccades, and the distribution of microsaccade  
638 direction, for each stimulus condition. Each of these 3 subjects showed broadband responses in  
639 their denoised data (Figure 10). All three subjects showed a higher rate of horizontal than vertical  
640 microsaccades in every stimulus condition (Figure 15), consistent with prior observations  
641 ([Engbert, 2006](#)), but there was no systematic pattern in saccade frequency as a function of stimulus  
642 condition; for example, the stimulus condition with the most and with the fewest microsaccades  
643 differed across the 3 subjects. Moreover, the subject with the highest broadband SNR among these  
644 3 (S6) had the lowest rate of microsaccades ( $\sim 0.5$  microsaccades / second). To test more directly  
645 whether microsaccades contributed to the measured broadband fields, we re-analyzed the data  
646 from these 3 subjects in two ways, either limited to only those epochs with microsaccades or only  
647 those epochs without microsaccades (Figure 15b). The broadband responses were evident in each  
648 subject in the epochs without microsaccades, indicating that this response is not entirely an artifact  
649 of microsaccades.

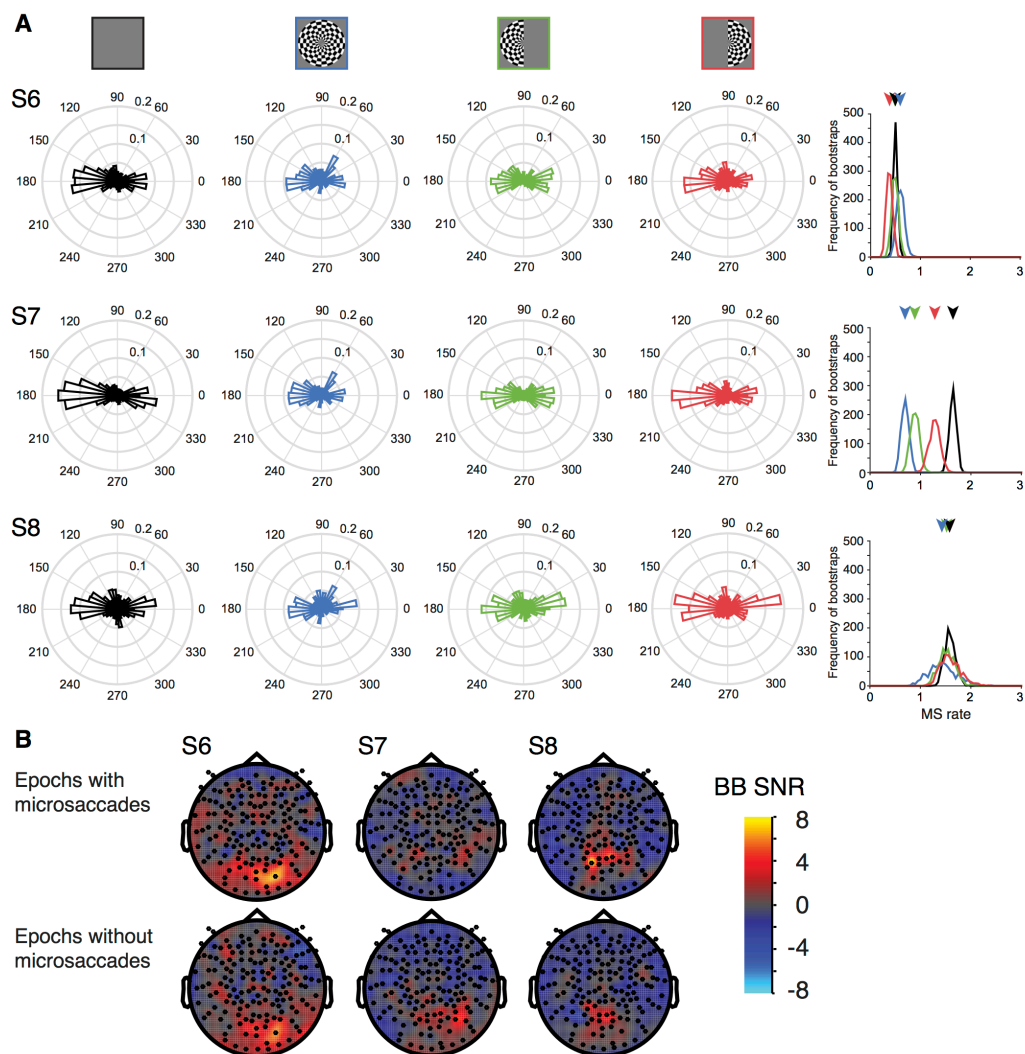

650

651 **Figure 15. Microsaccades during experimental conditions.** (A) The circular histograms show the frequency of  
652 microsaccades per 1-s epoch, binned by direction, for each of the 4 stimulus conditions (columns 1-4). The rows show  
653 data for 3 subjects. The last column shows the rate of microsaccades (per 1-s epoch) irrespective of direction, for each of  
654 the 4 stimulus conditions, bootstrapped 100 times over epochs. Arrows indicate the median rate for each condition. (B)  
655 Both-hemifield minus blank broadband SNR meshes limited to only those epochs with microsaccades (top row) or  
656 without microsaccades (bottom row). Made with *dfdMakeFigure15.m*.

657



## 658 Discussion

### 659 Summary

660 We separated the MEG signal into two components, one time-locked and one asynchronous with  
661 the stimulus. The stimulus-locked component, quantified by the amplitude at the contrast reversal  
662 frequency (12 Hz), was clearly visible in all subjects with minimal preprocessing. The signal  
663 showed spatial specificity, in that it was observed in occipital sensors, with higher SNR  
664 contralateral to the lateralized stimuli. These results are consistent with a long literature of steady  
665 state evoked potentials and fields, measured extracranially ([Adrian and Matthews, 1934a](#); [Norcia et  
666 al., 2015](#)) and intracranially ([Winawer et al., 2013](#)).

667 The asynchronous signal, spanning a broad range of frequencies (60-150 Hz), was visible with little  
668 preprocessing in some subjects and in the mean across subjects. However, this broadband response  
669 had low SNR compared to the stimulus-locked component. With our new automated denoising  
670 algorithm, the broadband SNR increased more than 2-fold, such that we could obtain reliable,  
671 spatially specific broadband signals in all individual observers. We showed in a subset of subjects  
672 that the broadband signals could not be explained by systematic biases in the pattern of fixational  
673 eye movements, supporting the interpretation that the broadband fields arise from neural activity  
674 and not from artifacts associated with eye movements. Finally, we showed that we obtained similar  
675 results using two different MEG instruments, a Yokogawa MEG with 157 axial gradiometers (NYU),  
676 and an Elekta 360 with 204 paired planar gradiometers (CiNet).

677 These results are *qualitatively* consistent with intracranial measurements in human using a similar  
678 stimulus paradigm ([Winawer et al., 2013](#)). However, it has proven much more difficult in the past to  
679 measure extracranial broadband signals arising from neural activity, in part because the  
680 extracranial signals are small. Below, we discuss the significance of broadband responses,  
681 challenges in measuring them extracranially, and the generalizability of our denoising algorithm.

### 682 Significance of broadband responses

683 In the 1920s and 30s, Hans Berger and others described oscillatory signals in surface EEG between  
684 10 and 25 Hz ([Berger, 1929](#); [Adrian and Matthews, 1934b](#)). Narrow peaks in EEG and MEG spectra  
685 have served as useful indices of cognitive, motor, and sensory engagement, and have been  
686 interpreted as a measure of coherence within a neuronal population. More recently, using  
687 intracranial recordings from patients, Crone and colleagues ([1998](#)) described an increase in power  
688 in higher frequencies (75-100 Hz) associated with motor movements. Subsequently, this high  
689 frequency power elevation was interpreted as a broadband (not oscillatory) signal, thought to  
690 reflect an increased level of activity within individual neurons, rather than an increase in neuronal  
691 synchrony ([Miller et al., 2007](#); [Miller et al., 2009b](#); [Miller et al., 2009c](#)). In support of this  
692 interpretation, it has been found that the level of the broadband signal correlates with single  
693 ([Manning et al., 2009](#)) and multiunit spike rates ([Ray and Maunsell, 2011](#)). Under some conditions,  
694 it is also correlated with the fMRI BOLD signal ([Hermes et al., 2012b](#); [Winawer et al., 2013](#)). The  
695 BOLD signal, however, is influenced by processes other than spiking ([Mathiesen et al., 1998](#);  
696 [Logothetis and Wandell, 2004](#); [Sirotin and Das, 2009](#)); hence quantifying broadband responses  
697 from the same stimuli or conditions studied with fMRI can help disentangle the relative  
698 contribution of spiking versus other, non-spiking neural activity, to an observed BOLD response.  
699 Moreover, ECoG studies in many different parts of the brain have measured broadband power  
700 elevations associated with perception, movement, language, and cognition ([Crone et al., 2006](#);  
701 [Miller et al., 2009a](#); [Hermes et al., 2012a](#); [Miller et al., 2014](#)) (Figure 16). Being able to reliably  
702 measure the broadband signal extracranially offers the opportunity to infer the level of neuronal

703 responses noninvasively and at a sub-second scale, complementing fMRI, as well as the oscillatory  
704 and time-locked (evoked) signals more commonly made with MEG and EEG.

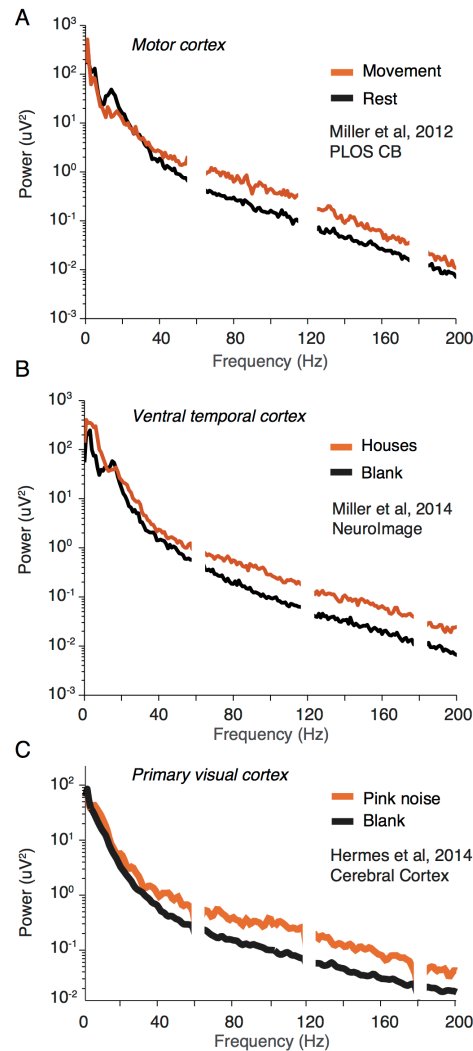

705  
706 **Figure 16. Broadband signals around the brain.** Examples of broadband field potentials from single ECoG electrodes in  
707 motor cortex (top), ventral temporal cortex (middle), and primary visual cortex (bottom). The power increases relative to  
708 baseline span at least 50 to 200 Hz. Adapted from (A) (Miller et al., 2012); (B) (Miller et al., 2014); (C) (Hermes et al.,  
709 2015).

## 710 Relation to prior measures of extracranial broadband and gamma band responses

711 *Broadband vs. narrowband gamma.* Several groups have distinguished between broadband power  
712 increases and narrowband gamma oscillations (Henrie and Shapley, 2005; Ray and Maunsell, 2011;  
713 Miller et al., 2014). The narrowband oscillation is reliably observed in visual cortex for some stimuli  
714 (e.g., high contrast bars and gratings) (Kayser et al., 2003; Jia et al., 2011; Miller et al., 2014). It  
715 typically has a peak frequency between 30 and 100 Hz and a bandwidth of  $\sim 10$ -20 Hz. The  
716 broadband response, in contrast, is found in many brain areas and for many types of stimuli, and  
717 spans at least 50-150 Hz, but can also extend to lower and higher frequencies (Miller et al., 2009c;  
718 Winawer et al., 2013). Robust narrowband gamma oscillations have been measured using MEG. For  
719 example, Hoogenboom et al (2006), using grating stimuli, measured a large signal peaked between  
720 60 and 80 Hz with a bandwidth of about 10 Hz. Similar responses have been measured by other  
721 groups, most often with MEG but also with EEG (Muthukumaraswamy and Singh, 2013). These

722 narrowband oscillations are quite different from the broadband fields we measured here, which  
723 span a much wider frequency range, have a lower amplitude, and likely reflect asynchronous neural  
724 activity rather than oscillations.

725 *Multiple gamma peaks.* Some extracranial studies have reported multiple distinct signals within the  
726 gamma band in a single experiment. For example, Wyart and Tallon-Baudry (2008) and Vidal et al.  
727 (2006) measured MEG responses to gratings and bars, respectively. They reported increases in  
728 power spanning 40-120 Hz, and interpreted this as two narrowband peaks, one between 45 and 65  
729 Hz and the other between 75 and 120 Hz. Both components were interpreted as oscillations arising  
730 from synchronous neural activity, and are likely different from the broadband signals we report  
731 here.

732 *Group averaged broadband.* Two MEG studies reported increases in high gamma power (60-140 Hz)  
733 during recall of visual stimuli (Nieuwenhuis et al., 2008; Nieuwenhuis et al., 2012). These studies  
734 showed the average across subjects (22 or 24), so that it is not known whether there were reliable  
735 responses in each separate subject.

736 *Motor cortex.* High frequency spectral power elevation (~65-100 Hz) has been shown from motor  
737 cortex measured extracranially (Ball et al., 2008; Darvas et al., 2010). This signal was most evident  
738 in group-averaged data and some but not all individuals, and were most reliable within a relative  
739 narrow band (~20-30 Hz wide). Ball et al. (2008) noted that better methods for measuring high  
740 frequency broadband extracranially would help resolve whether individual differences were due to  
741 measurement limitations or to the lack of high frequency brain signals in some subjects. Cheyne et  
742 al. (2008) measured high gamma (65-80 Hz) with MEG over motor cortex in individual subjects,  
743 and speculated that these signals reflect cortico-basal ganglia loops, as the subthalamic nucleus in  
744 the basal ganglia is known to have narrowband oscillations peaked at 70-80 Hz.

## 745 **Challenges in measuring extracranial broadband responses**

746 *Extracranial broadband signal strength is low.* Although having a high SNR after denoising, the MEG  
747 broadband signal was nonetheless small relative to baseline – about a 13% increase. Using nearly  
748 the identical stimulus, the broadband signal measured by ECoG was about 15 times larger (2.9 fold,  
749 or a ~190% increase over baseline) (Winawer et al., 2013). In contrast, the discrepancy was much  
750 smaller for the stimulus locked signal (an almost 8-fold increase over baseline measured with MEG,  
751 and 21-fold with ECoG). Why are the MEG broadband signals small? First, the MEG sensors pool  
752 over a large area, so that the baseline power reflects activity from a large fraction of the brain,  
753 whereas the visually driven broadband response likely comes from a much smaller region of cortex  
754 (Krusiński et al., 2011). In contrast, both the baseline and visually driven responses in an ECoG  
755 electrode on visual cortex arise from the same patch of brain tissue. Second, the signal amplitude  
756 depends not only on the pooling area, but also the phase coherence. If the broadband signal arises  
757 from incoherent neural activity, and the stimulus locked signal arises from coherent (synchronous)  
758 neural activity, then the former will grow with the square root of the number of the sources, and  
759 the latter with the number of sources. Since MEG pools over a much larger region of cortex than  
760 ECoG, the ratio of incoherent signal strength (e.g. broadband) to coherent (e.g. stimulus-locked) will  
761 be much lower. This logic is supported by modeling studies (Linden et al., 2011) and empirical  
762 studies with intra- and extracranial measures, which found that the signals which were more  
763 coherent intracranially had the highest efficiency in transmission to outside the head (Pfurtscheller  
764 and Cooper, 1975; Dalal et al., 2009).

765 *Extracranial measurements contain multiple noise sources.* Because the extracranial broadband  
766 power is low, noise becomes a potentially major impediment. Fixational eye movements (Yuval-  
767 Greenberg et al., 2008), head muscle contraction (Muthukumaraswamy, 2013), and environmental  
768 perturbations (Hämäläinen et al., 1993), produce noise picked up by MEG and EEG sensors, in

769 addition to the intrinsic noise from the brain ([Gonen-Yaacovi et al., 2016](#)). Many of these noise  
770 sources are spectrally broad and hence particularly problematic when investigating neural  
771 broadband signals.

772 Although spike fields generated from eye movements can be mistaken for broadband neural  
773 activity (sometimes called a “gamma imposter”; ([Yuval-Greenberg and Deouell, 2009](#))), it is unlikely  
774 that our spatially-specific broadband measures were substantially contaminated by eye movement  
775 artifacts. This was confirmed by our analyses of eye movement data in a subset of subjects, and by  
776 the fact that the middle posterior sensors where we observed broadband are not usually associated  
777 with MEG spike field artifacts ([Carl et al., 2012](#)). A second confound from eye movements, the  
778 electromagnetic fields arising from movement of the retina-to-cornea dipole, causes low frequency  
779 artifacts (4-20 Hz; ([Keren et al., 2010](#)), table 1) and therefore is unlikely to have affected our  
780 broadband measures (60-150 Hz).

781 Head muscles, like extraocular muscles, can also give rise to spectrally broadband contaminants  
782 ([Muthukumaraswamy, 2013](#)), as can many sources of noise outside the subject, from nearby  
783 subways to MRI centers to electrical equipment. Many of these sources could cause broadband  
784 signals. However, all of these noise sources are unlikely to be confined to occipital sensors and to  
785 co-vary with stimulus condition, and hence do not explain our broadband observations. Moreover,  
786 it is likely that these noise sources, if present, were included in our noise pool, and hence MEG  
787 Denoise would have reduced the effect of these large-scale noise artifacts.

## 788 **MEG Denoise and other denoising algorithm**

789 The MEG Denoise algorithm we present uses principal component analysis on a subset of sensors to  
790 remove noise. In principle, it can capture any noise source that contributes to the noise pool,  
791 including environmental, oculomotor, muscular, and neural. This differs from algorithms such as  
792 CALM, TSPCA, and tSSS, which are explicitly designed to remove environmental noise. Hence MEG  
793 Denoise is complementary to these methods. We found that the most effective analysis sequence  
794 was either to use MEG Denoise alone on the minimally pre-processed data, or to use an  
795 environmental denoising algorithm as a pre-processing step prior to running MEG Denoise. The  
796 algorithm has much in common with ICA denoising ([Vigario, 1997](#)), with a few important  
797 differences. First, PCA, unlike ICA, ranks the components by variance explained. Second, MEG  
798 Denoise explicitly separates the sensors into a noise pool and a potential signal pool. The  
799 combination of these features makes it easy to automate which components to project out. A benefit  
800 of automaticity is that it is easy to perform PCA, and hence denoise the data, at the time scale of  
801 individual events (e.g., >1,000 one-second epochs here). If the spatial pattern (the weights) of the  
802 PCs vary over time, then deriving the components independently within short epochs may be more  
803 effective, as demonstrated here (Figure 11, bars 1 versus 2).

804 To use MEG Denoise for other experimental designs, analyses, or scanners, one would need to  
805 change some of the input parameters. In particular, in addition to the experimental design matrix  
806 and data, there are two required inputs. These are the experiment-specific functions to summarize  
807 the MEG responses. In our experiments, one function computed the stimulus-locked signal and was  
808 used to define the noise pool. For most of our analyses, the other function computed the broadband  
809 power, which was the dependent measure. In principle, one could use a single function to both  
810 define the noise pool and evaluate the data, and in fact this is what we did when we denoised the  
811 stimulus-locked signal. For other experiments, one might use a function that computes the  
812 amplitude or latency of an evoked response, or the power in a limited temporal frequency band, or  
813 any measure relevant to the experiment. Alternatively, one could run a separate localizer  
814 experiment to identify a pool of potential sensors of interest and a pool of noise sensors, and then  
815 manually enter the list of noise sensors to denoise the main experiment. There are a number of

816 other optional inputs, such as the method to identify the noise pool, the accuracy metric (SNR /  $R^2$ ).  
817 For this paper, we used the defaults for all optional inputs.

## 818 **Conclusion**

819 We designed an experiment to elicit spatially specific patterns of MEG sensor responses and we  
820 developed a new denoising algorithm for MEG data. The results show that stimulus-driven  
821 broadband brain responses can be quantitatively characterized in individual subjects using a non-  
822 invasive method. Because we obtain high SNR measures from short experiments, the broadband  
823 signal can be used to address a wide range of scientific questions. Having access to this signal opens  
824 a window for neuroscientists to study signals associated with neuronal spike rates non-invasively  
825 at a high temporal resolution in the living human brain.

## 826 **Notes**

827 Supplementary material for this article will be made available online. This material has not been  
828 peer reviewed.

829

## 830 **References**

- 831
- 832 Adachi Y, Shimogawara M, Higuchi M, Haruta Y, Ochiai M (2001) Reduction of non-periodic  
833 environmental magnetic noise in MEG measurement by continuously adjusted least  
834 squares method. *IEEE T Appl Supercon* 11:669-672.
- 835 Adrian ED, Matthews BHC (1934a) The Berger rhythm potential changes from the occipital  
836 lobes in man. *Brain* 57:355-385.
- 837 Adrian ED, Matthews BH (1934b) The interpretation of potential waves in the cortex. *J Physiol*  
838 81:440-471.
- 839 Ball T, Demandt E, Mutschler I, Neitzel E, Mehring C, Vogt K, Aertsen A, Schulze-Bonhage A  
840 (2008) Movement related activity in the high gamma range of the human EEG.  
841 *Neuroimage* 41:302-310.
- 842 Berger H (1929) Über Elektroenkephalogramm des Menschen. *European Archives of Psychiatry*  
843 and *Clinical Neuroscience* 87:527-570.
- 844 Brainard DH (1997) The Psychophysics Toolbox. *Spat Vis* 10:433-436.
- 845 Buzsaki G, Anastassiou CA, Koch C (2012) The origin of extracellular fields and currents--EEG,  
846 ECoG, LFP and spikes. *Nature reviews Neuroscience* 13:407-420.
- 847 Carl C, Acik A, Konig P, Engel AK, Hipp JF (2012) The saccadic spike artifact in MEG.  
848 *Neuroimage* 59:1657-1667.
- 849 Cheyne D, Bells S, Ferrari P, Gaetz W, Bostan AC (2008) Self-paced movements induce high-  
850 frequency gamma oscillations in primary motor cortex. *Neuroimage* 42:332-342.
- 851 Crone NE, Sinai A, Korzeniewska A (2006) High-frequency gamma oscillations and human  
852 brain mapping with electrocorticography. *Neuroimage* 159:275-295.

- 853 Crone NE, Miglioretti DL, Gordon B, Lesser RP (1998) Functional mapping of human  
854 sensorimotor cortex with electrocorticographic spectral analysis. II. Event-related  
855 synchronization in the gamma band. *Brain* 121 ( Pt 12):2301-2315.
- 856 Dalal SS, Baillet S, Adam C, Ducorps A, Schwartz D, Jerbi K, Bertrand O, Garnero L, Martinerie  
857 J, Lachaux JP (2009) Simultaneous MEG and intracranial EEG recordings during  
858 attentive reading. *Neuroimage* 45:1289-1304.
- 859 Darvas F, Scherer R, Ojemann JG, Rao RP, Miller KJ, Sorensen LB (2010) High gamma  
860 mapping using EEG. *Neuroimage* 49:930-938.
- 861 de Cheveigne A, Simon JZ (2007) Denoising based on time-shift PCA. *Journal of neuroscience*  
862 *methods* 165:297-305.
- 863 Engbert R (2006) Microsaccades: A microcosm for research on oculomotor control, attention,  
864 and visual perception. *Prog Brain Res* 154:177-192.
- 865 Engbert R, Mergenthaler K (2006) Microsaccades are triggered by low retinal image slip. *Proc*  
866 *Natl Acad Sci U S A* 103:7192-7197.
- 867 Fries P, Scheeringa R, Oostenveld R (2008) Finding gamma. *Neuron* 58:303-305.
- 868 Gonen-Yaacovi G, Arazi A, Shahar N, Karmon A, Haar S, Meiran N, Dinstein I (2016) Increased  
869 ongoing neural variability in ADHD. *Cortex* 81:50-63.
- 870 Hämäläinen M, Hari R, Ilmoniemi RJ, Knuutila J, Lounasmaa OV (1993)  
871 Magnetoencephalography—theory, instrumentation, and applications to noninvasive  
872 studies of the working human brain. *Reviews of modern Physics* 65:413.
- 873 Harvey BM, Vansteensel MJ, Ferrier CH, Petridou N, Zuiderbaan W, Aarnoutse EJ, Bleichner  
874 MG, Dijkerman HC, van Zandvoort MJ, Leijten FS, Ramsey NF, Dumoulin SO (2013)  
875 Frequency specific spatial interactions in human electrocorticography: V1 alpha  
876 oscillations reflect surround suppression. *Neuroimage* 65:424-432.

- 877 Henrie JA, Shapley R (2005) LFP power spectra in V1 cortex: the graded effect of stimulus  
878 contrast. *Journal of neurophysiology* 94:479-490.
- 879 Hermes D, Miller KJ, Wandell BA, Winawer J (2015) Stimulus Dependence of Gamma  
880 Oscillations in Human Visual Cortex. *Cerebral cortex* 25:2951-2959.
- 881 Hermes D, Siero JC, Aarnoutse EJ, Leijten FS, Petridou N, Ramsey NF (2012a) Dissociation  
882 between neuronal activity in sensorimotor cortex and hand movement revealed as a  
883 function of movement rate. *J Neurosci* 32:9736-9744.
- 884 Hermes D, Miller KJ, Vansteensel MJ, Aarnoutse EJ, Leijten FS, Ramsey NF (2012b)  
885 Neurophysiologic correlates of fMRI in human motor cortex. *Human brain mapping*  
886 33:1689-1699.
- 887 Honey CJ, Thesen T, Donner TH, Silbert LJ, Carlson CE, Devinsky O, Doyle WK, Rubin N,  
888 Heeger DJ, Hasson U (2012) Slow cortical dynamics and the accumulation of  
889 information over long timescales. *Neuron* 76:423-434.
- 890 Hoogenboom N, Schoffelen JM, Oostenveld R, Parkes LM, Fries P (2006) Localizing human  
891 visual gamma-band activity in frequency, time and space. *NeuroImage* 29:764-773.
- 892 Jia X, Smith MA, Kohn A (2011) Stimulus selectivity and spatial coherence of gamma  
893 components of the local field potential. *J Neurosci* 31:9390-9403.
- 894 Kay KN, Rokem A, Winawer J, Dougherty RF, Wandell BA (2013) GLMdenoise: a fast,  
895 automated technique for denoising task-based fMRI data. *Frontiers in neuroscience*  
896 7:247.
- 897 Kayser C, Salazar RF, Konig P (2003) Responses to natural scenes in cat V1. *Journal of*  
898 *neurophysiology* 90:1910-1920.
- 899 Keren AS, Yuval-Greenberg S, Deouell LY (2010) Saccadic spike potentials in gamma-band  
900 EEG: characterization, detection and suppression. *Neuroimage* 49:2248-2263.



- 901 Krusienski DJ, Grosse-Wentrup M, Galan F, Coyle D, Miller KJ, Forney E, Anderson CW (2011)  
902 Critical issues in state-of-the-art brain-computer interface signal processing. *J Neural*  
903 *Eng* 8:025002.
- 904 Lima B, Cardoso MM, Sirotin YB, Das A (2014) Stimulus-related neuroimaging in task-engaged  
905 subjects is best predicted by concurrent spiking. *J Neurosci* 34:13878-13891.
- 906 Linden H, Tetzlaff T, Potjans TC, Pettersen KH, Grun S, Diesmann M, Einevoll GT (2011)  
907 Modeling the spatial reach of the LFP. *Neuron* 72:859-872.
- 908 Liu J, Newsome WT (2006) Local field potential in cortical area MT: stimulus tuning and  
909 behavioral correlations. *J Neurosci* 26:7779-7790.
- 910 Logothetis NK, Wandell BA (2004) Interpreting the BOLD signal. *Annu Rev Physiol* 66:735-769.
- 911 Manning JR, Jacobs J, Fried I, Kahana MJ (2009) Broadband shifts in local field potential power  
912 spectra are correlated with single-neuron spiking in humans. *J Neurosci* 29:13613-  
913 13620.
- 914 Mathiesen C, Caesar K, Akgoren N, Lauritzen M (1998) Modification of activity-dependent  
915 increases of cerebral blood flow by excitatory synaptic activity and spikes in rat  
916 cerebellar cortex. *J Physiol* 512 ( Pt 2):555-566.
- 917 Miller KJ, Weaver KE, Ojemann JG (2009a) Direct electrophysiological measurement of human  
918 default network areas. *Proc Natl Acad Sci U S A* 106:12174-12177.
- 919 Miller KJ, Sorensen LB, Ojemann JG, den Nijs M (2009b) Power-law scaling in the brain surface  
920 electric potential. *PLoS computational biology* 5:e1000609.
- 921 Miller KJ, Zanos S, Fetz EE, den Nijs M, Ojemann JG (2009c) Decoupling the cortical power  
922 spectrum reveals real-time representation of individual finger movements in humans. *J*  
923 *Neurosci* 29:3132-3137.

- 924 Miller KJ, Honey CJ, Hermes D, Rao RP, denNijs M, Ojemann JG (2014) Broadband changes in  
925 the cortical surface potential track activation of functionally diverse neuronal populations.  
926 Neuroimage 85 Pt 2:711-720.
- 927 Miller KJ, Leuthardt EC, Schalk G, Rao RP, Anderson NR, Moran DW, Miller JW, Ojemann JG  
928 (2007) Spectral changes in cortical surface potentials during motor movement. J  
929 Neurosci 27:2424-2432.
- 930 Miller KJ, Hermes D, Honey CJ, Hebb AO, Ramsey NF, Knight RT, Ojemann JG, Fetz EE  
931 (2012) Human motor cortical activity is selectively phase-entrained on underlying  
932 rhythms. PLoS Comput Biol 8:e1002655.
- 933 Muthukumaraswamy SD (2013) High-frequency brain activity and muscle artifacts in MEG/EEG:  
934 a review and recommendations. Front Hum Neurosci 7:138.
- 935 Muthukumaraswamy SD, Singh KD (2013) Visual gamma oscillations: the effects of stimulus  
936 type, visual field coverage and stimulus motion on MEG and EEG recordings.  
937 Neuroimage 69:223-230.
- 938 Nieuwenhuis IL, Takashima A, Oostenveld R, Fernandez G, Jensen O (2008) Visual areas  
939 become less engaged in associative recall following memory stabilization. Neuroimage  
940 40:1319-1327.
- 941 Nieuwenhuis IL, Takashima A, Oostenveld R, McNaughton BL, Fernandez G, Jensen O (2012)  
942 The neocortical network representing associative memory reorganizes with time in a  
943 process engaging the anterior temporal lobe. Cereb Cortex 22:2622-2633.
- 944 Norcia AM, Appelbaum LG, Ales JM, Cottareau BR, Rossion B (2015) The steady-state visual  
945 evoked potential in vision research: A review. J Vis 15:4.
- 946 Oostenveld R, Fries P, Maris E, Schoffelen JM (2011) FieldTrip: Open source software for  
947 advanced analysis of MEG, EEG, and invasive electrophysiological data. Computational  
948 intelligence and neuroscience 2011:156869.

- 949 Pelli DG (1997) The VideoToolbox software for visual psychophysics: transforming numbers into  
950 movies. *Spat Vis* 10:437-442.
- 951 Pfurtscheller G, Cooper R (1975) Frequency dependence of the transmission of the EEG from  
952 cortex to scalp. *Electroencephalography and clinical neurophysiology* 38:93-96.
- 953 Podvalny E, Yeagle E, Megevand P, Sarid N, Harel M, Chechik G, Mehta AD, Malach R (2017)  
954 Invariant Temporal Dynamics Underlie Perceptual Stability in Human Visual Cortex. *Curr*  
955 *Biol* 27:155-165.
- 956 Ray S, Maunsell JH (2011) Different origins of gamma rhythm and high-gamma activity in  
957 macaque visual cortex. *PLoS biology* 9:e1000610.
- 958 Schalk G, Leuthardt EC (2011) Brain-computer interfaces using electrocorticographic signals.  
959 *IEEE Rev Biomed Eng* 4:140-154.
- 960 Seki K, Nakasato N, Fujita S, Hatanaka K, Kawamura T, Kanno A, Yoshimoto T (1996)  
961 Neuromagnetic evidence that the P100 component of the pattern reversal visual evoked  
962 response originates in the bottom of the calcarine fissure. *Electroencephalography and*  
963 *clinical neurophysiology* 100:436-442.
- 964 Sirotin YB, Das A (2009) Anticipatory haemodynamic signals in sensory cortex not predicted by  
965 local neuronal activity. *Nature* 457:475-479.
- 966 Taulu S, Simola J (2006) Spatiotemporal signal space separation method for rejecting nearby  
967 interference in MEG measurements. *Phys Med Biol* 51:1759-1768.
- 968 Taulu S, Hari R (2009) Removal of magnetoencephalographic artifacts with temporal signal-  
969 space separation: demonstration with single-trial auditory-evoked responses. *Hum Brain*  
970 *Mapp* 30:1524-1534.
- 971 Vidal JR, Chaumon M, O'Regan JK, Tallon-Baudry C (2006) Visual grouping and the focusing of  
972 attention induce gamma-band oscillations at different frequencies in human  
973 magnetoencephalogram signals. *J Cogn Neurosci* 18:1850-1862.

- 974 Vigario RN (1997) Extraction of ocular artefacts from EEG using independent component  
975 analysis. *Electroen Clin Neuro* 103:395-404.
- 976 Winawer J, Kay KN, Foster BL, Rauschecker AM, Parvizi J, Wandell BA (2013) Asynchronous  
977 broadband signals are the principal source of the BOLD response in human visual  
978 cortex. *Curr Biol* 23:1145-1153.
- 979 Wyart V, Tallon-Baudry C (2008) Neural dissociation between visual awareness and spatial  
980 attention. *J Neurosci* 28:2667-2679.
- 981 Yuval-Greenberg S, Deouell LY (2009) The broadband-transient induced gamma-band  
982 response in scalp EEG reflects the execution of saccades. *Brain Topogr* 22:3-6.
- 983 Yuval-Greenberg S, Deouell LY (2011) Scalp-recorded induced gamma-band responses to  
984 auditory stimulation and its correlations with saccadic muscle-activity. *Brain Topogr*  
985 24:30-39.
- 986 Yuval-Greenberg S, Tomer O, Keren AS, Nelken I, Deouell LY (2008) Transient induced  
987 gamma-band response in EEG as a manifestation of miniature saccades. *Neuron*  
988 58:429-441.
- 989
